# Supplementary material for: Cost of providing Peer Education programme in the National Adolescent Health programme and its variations across two states of India.
Source: Research Square preprint supplement (doi:10.21203/rs.3.rs-8470187/v1), 2026-01-20
Supplement: Supplementary file 1 [file 3d2ddc2369fb448176932f09.xlsx]

## Sheet: HR district 
Human Resource Cost for the year 2020-21 (DAMOH)
S. No	A. Personnel	B. No. of personnel	D. Total no of hours contributed in a month for PE prog	G. Gross salary per month (INR)		Per hour's salary	Apportioned salary for a month	Total cost for a year		Remarks
					Per day's salary				Total apportioned HR cost for a block for an year
1	CHMO	1	12	150000	5000	625	7500	67500	11250
2	DPM	1	1	57000	1900	237.5	237.5	2137.5	356.25	He is incharge DPM . His actual post is District Media Officer.
3	RKSK Coordinator	1	28	35000	1166.67	145.833	4083.33	36750	6125	The District RKSK coordinator is incharge district coordinator. He is also incharge district IEC Officer but his actual post is District Community Mobiliser and gets the salary for that.
4	Prog. Coordinator (NGO)	1	15 days	17000			8500	76500	12750	The PCs are also involved in supportive supervision of PE for around 12 days. Since the NGO is primarily engaged in PE and AFHC programme , henve an equal time (1:1) contribution has been apportioned here.
Total									30481.2

## Sheet: Calculation
Total Programme cost for Damoh (2020-2021)						Total Programme Cost for Damoh (2020-2021)
	BLOCKS						BLOCKS
Programme Activity	Hindoriya	Jabera	Patera	Pathariya		Programme Activity	Damoh	% Share	Jabera	% Share	Patera	% Share	Pathariya	% Share	Average Costs	% Share
Human Resource Cost	138529	124706	133481	124346		Human Resource Cost	138529	23.9323	124706	22.2938	133481	23.3705	124346	22.2774	130266	22.9792
Monitoring	341908	338390	339983	336827		Monitoring	341908	59.0681	338390	60.494	339983	59.5259	336827	60.3445	339277	59.8494
Meetings	2400	281.25	1687.5	1000		Meetings	2400	0.414624	281.25	0.0502791	1687.5	0.295455	1000	0.179156	1342.19	0.236765
Administrative cost	36000	36000	36000	36000		Administrative cost	36000	6.21937	36000	6.43573	36000	6.30305	36000	6.44961	36000	6.3505
Peer Educators Incentives Costs	60000	60000	60000	60000		Peer Educators Incentives Costs	60000	10.3656	60000	10.7262	60000	10.5051	60000	10.7493	60000	10.5842
Total Cost	578837	559377	571152	558173		Total Cost	578837		559377		571152		558173		566885
						Per Unit cost (PE+AEP)	296.84		310.42		301.559		336.249		311.267
HR	Hindoriya	Jabera	Patera	Pathariya		Per Unit cost (AEP)	340.492		349.611		346.153		387.62		355.969
B level	108048	94225	103000	93865		Per Unit Cost (PE)	2315.35		2769.19		2340.79		2537.15		2490.62
D level	30481.2	30481.2	30481.2	30481.2
Total HR	138529	124706	133481	124346
Meetings	Hindoriya	Jabera	Patera	Pathariya		Total PE	250		202		244		220
	2400	281.25	1687.5	1000		Total AEP	1700		1600		1650		1440
						PE +AEP	1950		1802		1894		1660
Monitoring	Hindoriya	Jabera	Patera	Pathariya
B level	330800	327281	328875	325719
D level	11108.3	11108.3	11108.3	11108.3
Total	341908	338390	339983	336827
	BLOCK NAME
	Jabera	Patera	Pathariya	Hindoriya
No. of ASHAs involved in RKSK (From April 2020-March 2021)	100	122	110	125
No. of ASHA faciliataors involved in RKSK(From April 2020-March 2021)	6	13	10	11
No. of ANM involved in RKSK (From April 2020-March 2021)	17	12	15	14
No. of Mentors involved in RKSK (From April 2020-March 2021)	4	4	4	4
No. of new PE selected.(From April 2020-March 2021)	202	244	220	250

## Sheet: Training
Training Cost for 2020-21
Name of the Training	Level of training	Duration of training (in hrs.)	No of trainees trained	Type of Trainer - (Hired/ department personnel)	Expenditure incurred in Training Activities.
	(State level/District level/Block level/ any other training)				Trainer (TA/DA, Accomodation etc.)	Trainees (TA/DA, Accomodation etc.)	Development of training materials	Printing of training material	Venue cost	Any other cost (Food expenses etc.)	Total Cost		Remarks
Peer Educator Training											0		The Peer Educators were selected but no trainings were conducted in this year for any of the blocks. Hence the training cost is nil.

## Sheet: Monitoring Block (2020-21) 
S. No	A. Personnel	Total no. of visits for monitoring	Total no. of Visits for RKSK	Total time contribution for monitoring in a month (in min)	Time contribtion for PE prog in each visit (in min)	Total Time contribtion for PE prog in a month (in min)	Mobility Support (Per month)	Total mobility cost apportioned from mobility support for an year	G. Gross salary per month (INR)	Per hour salary	Apportioned cost from the salary for a month	Total Apportioned cost from the salary for a year	Total monitoring cost for a year	Total monitoring cost for a block	Remarks
BLOCK LEVEL STAFF
Block 1	Hindoriya
	BPM	4	2	1920	20	40	2000	375	32000	133.333	88.8889	800	1175	330800	The BPMs salary has been taken as per Panna.
	BCM	10	5	4800	60	300	3000	1687.5	21000	87.5	437.5	3937.5	5625
	Mentors										360000		324000
Block 2	Jabera
	BPM (Here an MPW was the BPM then)	8	2	3840	30	60	2000	281.25	40000	166.667	166.667	1500	1781.25	327281
	BCM (Here BEE )	2	1	960	30	30	3000	843.75	35000	145.833	72.9167	656.25	1500
	Mentors										360000		324000
Block 3	Patera
	BCM (Here BCM was also the incharge BPM in the mentioned year)	12	8	5760	30	240	3000	1125	25000	104.167	416.667	3750	4875	328875
	Mentors										360000		324000
Block 4	Pathariya
	BEE (He is incharge BPM)	8	1	3840	20	20	2000	93.75	40000	166.667	55.5556	500	593.75	325719	The incharge BPM mentioned he does not know of the programme
	BCM	10	2	4800	30	60	3000	337.5	21000	87.5	87.5	787.5	1125
	Mentors										360000		324000
NOTE: The programme began from July 2020. Hence only 9 months are accounted for during the costing.
															360000
															324000

## Sheet: HR Block
Human Resource Cost for the year 2020-21 : DAMOH
S. No	A. Personnel	B. No. of personnel	D. Total no of hours contributed for PE programme	G. Gross salary per month (INR)	Per day's salary	Per hour's salary	Apportioned salary for a month for all the personnels	Total cost For an year	Remarks
BLOCK 1 : Hindoriya
1	ASHA incentive for 250 PE	NA	NA	25000	NA	NA	NA	25000
2	Asha F.	11	8	7200	240	30	2640	23760
3	BCM	1	25	21000	700	87.5	2187.5	19687.5
4	BPM	1	3	32000	1066.67	133.333	400	3600
5	Mentors							36000
TOTAL								108048		360000
BLOCK 4 : Jabera										36000
1	ASHA incentive (for 202 PE)	NA	NA	20200	NA	NA	NA	20200
2	ASHA Facilitator	12	10	7200	240	30	3600	32400
3	Incharge BCM (BEE)	1	2	35000	1166.67	145.833	291.667	2625
4	BPM Incharge	1	2	40000	1333.33	166.667	333.333	3000
5	Mentors							36000
TOTAL								94225
BLOCK 3 : Patera
1	ASHA (incentive for 244 PE)	NA	NA	24400	NA	NA	NA	24400
2	BCM ( Incharge BPM)	1	8	25000	833.333	104.167	833.333	7500
3	ASHA FACILITATOR	13	10	7200	240	30	3900	35100
4	Mentors							36000
TOTAL								103000
BLOCK 2 : Pathariya
1	ASHA incentive	NA	NA	22000	NA	NA	NA	22000
2	BCM (incharge)	1	10	21000	700	87.5	875	7875
3	BPM (Incharge)	1	40 min.	40000	1333.33	166.667	110	990
4	ASHA Facilitor	10	10	7200	240	30	3000	27000
5	Mentors							36000
TOTAL								93865

## Sheet: Meetings 
Meeting Costs (2020-21)
BLOCK	Name of the meeting /Workshop	Level (District/Block/Sub centre)	No of meetings in a year	No. of participants in the meeting	Duration of meeting in hrs.	Time duration for which RKSK is discussed.		Total Apportioned cost for 1 Meeting	Total apportioned cost for PE activity.	Total Apportioned cost for the year for PE activity.	Remarks
							Total cost of Meetings
Hindoriya	ASHA Meeing	Block	8		5	45 min	8000	1200	300	2400	1)Cost and the duration of the meetings recorded as per the response of the BPM,as the Counsellor was newly appointed and could not provide any information upon repeated calls in Hindoriya.
Jabera	ASHA meet	Block	3		4	30 min	3000	375	93.75	281.25	2) In Jabera there wascno counsellor during the time when the data was asked. The data is providec by the BEE.
Patera	ASHA meeting	Block	9		5	45 min	5000	750	187.5	1687.5	3) In Patera , the cost is noted as per BCM and counsellors.
Pathariya	ASHA meeting	Block	6		3	40 min	3000	666.667	166.667	1000	4)The number of meetings were providedcby the counseelor and cost for each ASHA meeting by BPM in Pathariya.
Total Meeting Cost for the Year										5368.75	** As the programme started in July in the given financial year, there were no meetings conducted specific to RKSK i.e. the AFC or the Block level Review meetings. Instead RKSK related information were delivered by the counsellors during the regular ASHA meetings conducted in the CHC. The total time duration for which RKSK is discussed is then apprtioned for PE programme (1:4).

## Sheet: Administrative cost
Administrative Cost (April 2020-March 2021)							Remarks
S. no.	Activity Name	Expenditure	Total expenditure for 2020-21 (April 2020 to March 2021)
			BLOCK NAME
			Jabera	Patera	Pathariya	Hindoriya
1	Peer Educator Training	Expenditure on Training	0	0	0	0	1)The data is entered as per the data received by the NGO. 2) For the costing exercise, we have considered only Supportive supervision by the mentors (also called the trainers ) as they are directly involved with the PEs in the villages. 3)As there were no trainings held in the given financial year , as the programme started in July 2020, henec the expenditure on training is zero. 4)The administr…
		Administrative cost	0	0	0	0
		Total expenditure	0	0	0	0
2	Programme Coordinator RKSK	Expenditure on salary	0	0	0	0
		Administrative cost	0	0	0	0
		Total expenditure	0	0	0	0
3	Supportive supervision by the trainers/mentors	Expenditure on salary	360000	360000	360000	360000
		Administrative cost	36000	36000	36000	36000
		Total expenditure	396000	396000	396000	396000
4	Counselling activities	Expenditure on salary	114800	114800	114800	114800
		Administartive cost	11480	11480	11480	11480
		Total expenditure	126280	126280	126280	126280

## Sheet: monitoring district
	Personnel	Total no. of visits for monitoring	Total no. of Visits for RKSK	Total time contribution for monitoring in a year (in min)	Time contribtion for PE prog in each visit (in min)	Total Time contribtion for PE prog in a year (in min)	Mobility Support (year)	Total mobility cost apportioned from mobility support for an year per block	G. Gross salary per month (INR)	Per hour salary	Apportioned cost from the salary for a visit	Total Apportioned cost from the salary for a year per block	Total monitoring cost for a year	Remarks
DISTRICT LEVEL STAFF
CHMO	1	24	24	11520	20	480	240000	1666.67	150000	625	208.333	833.333	2500	For tHe DPM and CHMO , the total no of annual visits are taken inyo account while calculating the monitiring visits and divided by 6 for there are 6 blocks in which programme is being implemented. The data is recorded as per Dpm Panna (2019-21) conversation with sir.
DPM	1	24	24	11520	20	480	240000	1666.67	57000	237.5	79.1667	316.667	1983.33
RKSK Coordinator	1	90	90	43200	120	10800	54000	2250	35000	145.833	291.667	4375	6625	The RKSK coordinator is incharge RKSK coordinator. He has 2 additonal charges as well. As per him, the mobility support is 6000 per month for RKSK exclusively. While going on visits however he monitors other programmes also and mentions about 4-5 hrs per vsisit for all activities of RKSK in a month. He could not pin point as to how many programmes can be monitored in a month nor does exclsively f…
Total													11108.3	As per the RKSK District Coordinantor , no RKSK Nodal Officer is in charge, neither is the any contribution in the programme mentionedby him.

## Sheet: Sheet3
Total Programme cost for Damoh (2020-2021)							Total Programme cost for Damoh (2020-2021)
Programme Activity	BLOCKS						BLOCKS
	Hindoriya	Jabera	Patera	Pathariya	Average Cost		Programme Activity	Hindoriya	Jabera	Patera	Pathariya
Human Resource Cost	462529	390481	457481	448346	439709		Human Resource Cost	462529	390481	457481	448346
	0.8915	0.8851	89.5	0.9
Monitoring	17908.33 (3.45 %)	14389.58 (3.26%)	15983.33 (3.13%)	12827.08 (2.57%)	15277.1		Monitoring	17908.3	14389.6	15983.3	12827.1
Meetings	2400 (0.47 %)	281.25 (0.06%)	1687.5 (0.33%)	1000 (0.2%)	1342.19		Meetings	2400	281.25	1687.5	1000
Administrative cost	36000 (6.94 %)	36000 (8.16%)	36000 (7.04 %)	36000 (7.23%)	36000		Administrative cost	36000	36000	36000	36000
Total Cost	518837	441152	511152	498173	492329		Total Cost	518837	441152	511152	498173
Per unit Cost	305.198	306.356	309.789	311.358	308.175
