# Supplementary material for: Cost of providing Peer Education programme in the National Adolescent Health programme and its variations across two states of India.
Source: Research Square preprint supplement (doi:10.21203/rs.3.rs-8470187/v1), 2026-01-20
Supplement: Supplementary file 2 [file 4e4bd8ec86370a7b5475eccc.xlsx]

## Sheet: HR Community level
Human Resource Cost for the year 2019-20 : Panna										Human Resource Cost for the year 2020-21 : Panna
S. No	Personnel	No. of personnel	Time Contribution for PE programme in a month (in hrs)	Gross salary per month (INR)	Per day salary	Per hour salary	Total Appportioned cost cost For an year	Remarks		S. No	Personnel	No. of personnel	Time Contribution for PE programme in a month (in hrs)	Gross salary per month (INR)	Per day salary	Per hour salary	Total Appportioned cost cost For an year	Remarks
BLOCK 1 : Ajaigarh								1) The number of mentors, ASHA Facilitator involved in the programme and Peer educators selected in the given year (for ASHA incentive) are taken as per the data received by the programme coordinator. 2)The salary of the mentors from NGO are reported as per the data received by the NGO for the given financial year. As per circulars, the mentors are mandated to work for 25 days in a month and thei…		BLOCK 1 : Ajaigarh								1) The number of mentors, ASHA Facilitator involved in the programme and Peer educators selected in the given year (for ASHA incentive) are taken as per the data received by the programme coordinator. 2)The salary of the mentors from NGO are reported as per the data received by the NGO for the given financial year. As per circulars, the mentors are mandated to work for 25 days in a month and thei…
	ASHA incentive for 53 PE	NA	NA	NA	NA	NA	5300				ASHA incentive for 80 PE	NA	NA	NA	NA	NA	8000
	Asha F.	10	15	6200	206.667	25.8333	46500				Asha F.	22	15	7200	240	30	118800
	TOTAL						51800				TOTAL						126800			525800
BLOCK 2 : Devendranagar										BLOCK 2 : Devendranagar
	ASHA incentive for 29 PE	NA	NA	NA	NA	NA	2900				ASHA incentive for 78 PE	NA	NA	NA	NA	NA	7800
	ASHA Facilitor	16	15	6200	206.667	25.8333	74400				ASHA Facilitor	21	15	7200	240	30	113400
	Total						77300				Total						121200
BLOCK 3 : Pawai										BLOCK 3 : Pawai
	ASHA (incentive for 0 PE)	NA	NA	NA	NA	NA	0				ASHA (incentive for 180 PE)	NA	NA	NA	NA	NA	18000
	ASHA FACILITATOR	24	15	6200	206.667	25.8333	111600				ASHA Facilitator	29	15	7200	240	30	156600
	Total						111600				Total						174600
BLOCK 4 : Shahnagar										BLOCK 4 : Shahnagar
	ASHA incentive (for 47 PE)	NA	NA	NA	NA	NA	4700				ASHA incentive (for 60 PE)	NA	NA	NA	NA	NA	6000
	ASHA Facilitator	15	15	6200	206.667	25.8333	69750				ASHA Facilitator	18	15	7200	240	30	97200
	Total						74450				Total						103200
			51800	77300	111600	74450							126800	121200	174600	103200

## Sheet: HR+ Moni District Level correct
2020-21																			2019-20
	Personnel	Total no. of visits for monitoring in a year	Total no. of Visits for RKSK	Time contribtion for PE prog in each visit	Mobility Support )	Total time contribution for monitoring in a year(in min)	Total time contri for moni of PE prog in a year (in min)	Total apportioned cost from mobility support in a year per block	Gross salary per month (INR)	Per day's salary	Per hour's salary	Apportioned salary from monitoring for a visit	Total appotioned cost for salary for an year per block	Total monitoring cost for a year per block	Time contri for the prog apart from monitoring in a month (hr)	HR cost (yearly) for a block	Final Total HR Cost		S. No	Personnel	Total no. of visits for monitoring in a year	D. Total no. of Visits for RKSK in a year	Time contribtion for PE prog in each visit(min)	Mobility Support (yearly)	Total time contribution for monitoring in a year(in min)	Total time contri for moni of PE prog in a year (in min)	Total apportioned cost from mobility support in a year per block	Gross salary per month (INR)	Per hour's salary	Apportioned salary from monitoring for a visit	Total appotioned cost for salary for an year per block	Total monitoring cost for a year	Time contri for the prog apart from monitoring in a month (hr)	HR Cost yearly Per Block	Final Total HR Cost	Remarks
CHMO	1	24	24	20min	240000	11520	480	1666.67	150000	5000	625	208.333	833.333	2500	12	15000	15000		CHMO	1	24	24	20	240000	11520	480	1666.67	150000	625	208.333	833.333	2500	12	15000	15000	1)For the DPM and CHMO , the total no of annual visits are taken into account while calculating the monitiring visits and divided by 6 for there are 6 blocks in which programme is being implemented. The data is recorded as per DPM Panna (2019-21) conversation with sir. 2)As per the data shared by the NGO, the salary has been mentioned for the Prog Coordinator . The monthly salary is Rs 17000. How…
DPM	1	24	24	20 min	240000	11520	480	1666.67	65000	2166.67	270.833	90.2778	361.111	2027.78	12	6500	6500		DPM	1	24	24	20	240000	11520	480	1666.67	65000	270.833	90.2778	361.111	2027.78	12	6500	6500
RKSK Coordinator	1	120	120	120min	72000	57600	14400	3000	35000	1166.67	145.833	291.667	5833.33	8833.33	8hrs per day	17500	11666.7		RKSK Coordinator	1	120	120	120	36000	57600	14400	1500	28000	116.667	233.333	4666.67	6166.67	8hrs per day	14000	9333.33
Prog Coordi. (NGO)	1								17000						15 days	2833.33	2833.33		Programme Coordinator	1								8500						708.333	708.333
Total														13361.1			36000		Total													10694.4			31541.7
check CHMOand dpm damoh
should we add for chmo and dpm , similarly for block level staff.
						Given:
						Gross salary per month = 150000
						Total mobility support in a year = 240000
						Total no of monitoring visists in a year =24
						Total time contributed for monitoring of PE programme in 1 visit =20min
						Total time contributed for monitoring of all programmes in ayear = 8 hrs * 24 visits
						11520
						Total time contributed for monitoring of PE programme in 24 visits =20min * 24 visits
						480
						1) Total mobility cost apportioned from mobility support for a year per block = Total mobility support cost/Total time utilized for monitoring of all programme* Total time contri for moni. of PE prog/6
						240000/11520*480/6 …............ (1)
						1666.67
						2) Total apportioned cost from the salary for monitoring of PE prog for an year per block = Salary of 480 min. /6
						Rs 833.33….....................(2)
						Hence Total apportioned monitoring cost for a block = (1) + (2)
						2500

## Sheet: Calculation_2019-20
Total Programme cost for Panna (2019-2020)						Total Programme cost for Panna (2019-2020)
BLOCKS							BLOCKS
Programme Activity	Ajaigarh	Devendranagar	Pawai	Shahnagar		Programme Activity	Ajaigarh	(%)	Devendranagar	(%)	Pawai	(%)	Shahnagar	(%)
Human Resource Cost	182542	223142	282342	225892	913917	Human Resource Cost	182542	13.3353	223142	14.3562	282342	16.4048	225892	14.3492
Monitoring	875282	918757	1.09829e+06	879404	3.77174e+06	Monitoring	875282	63.9426	918757	59.1099	1.09829e+06	63.8138	879404	55.862
Meetings	89815	245460	220455	128005	683735	Meetings	89815	6.56132	245460	15.7921	220455	12.809	128005	8.1312
Training	113835	60875	0	222675	397385	Training	113835	8.31606	60875	3.9165	0	0	222675	14.1449
Administrative cost	107383	106087	120000	118268	451738	Administrative cost	107383	7.84472	106087	6.8253	120000	6.97232	118268	7.51268
Total Cost	1.36886e+06	1.55432e+06	1.72109e+06	1.57424e+06	6.21851e+06	Total Cost	1.36886e+06		1.55432e+06		1.72109e+06		1.57424e+06
						PE Kits Costs	26500		14500		0		23500
						Total PE incentive per block	153727		179513		177529		190423
						Final Total cost	1.54908e+06		1.74833e+06		1.89862e+06		1.78817e+06
Mentors 10% salary in HR (added in Bolck HR)	96000	100000	120000	96000		Per unit cost	176.252		205.276		180.787		246.576
HR	Ajaigarh	Devendranagar	Pawai	Shahnagar		Total Programme Cost : Block Ajaigarh (2019-20)				Total Programme Cost : Block Devendranagar (2019-20)				Total Programme Cost : Block Pawai (2019-20)				Total Programme Cost : Block Shahnagar (2019-20)
Community level level	51800	77300	111600	74450		Programme Activity	Ajaigarh	Percentage Share (%)		Programme Activity	Devendranagar	Percentage Share (%)		Programme Activity	Pawai	Percentage Share (%)		Programme Activity	Shahnagar
B level	99200	114300	139200	119900	here added the mentors
D level	31541.7	31541.7	31541.7	31541.7		Human Resource Cost	182542	13.3353		Human Resource Cost	223142	14.3562		Human Resource Cost	282342	16.4048		Human Resource Cost	225892
Total HR	182542	223142	282342	225892		Monitoring	875282	63.9426		Monitoring	918757	59.1099		Monitoring	1.09829e+06	63.8138		Monitoring	879404
						Meetings	89815	6.56132		Meetings	245460	15.7921		Meetings	220455	12.809		Meetings	128005
Meetings	Ajaigarh	Devendranagar	Pawai	Shahnagar		Training	113835	8.31606		Training	60875	3.9165		Training	0	0		Training	222675
	89815	245460	220455	128005		Administrative cost	107383	7.84472		Administrative cost	106087	6.8253		Administrative cost	120000	6.97232		Administrative cost	118268
						Total Cost	1.36886e+06			Total Cost	1.55432e+06			Total Cost	1.72109e+06			Total Cost	1.57424e+06
	960000	1000000	1200000	960000		Per Unit Cost	1721.83				3573.15					0
Monitoring	Ajaigarh	Devendranagar	Pawai	Shahnagar
B level	864588	908062	1087600	868710
D level	10694.4	10694.4	10694.4	10694.4
Total	875282	918757	1.09829e+06	879404		A	D	P	S
90% mentors salary added to B level	864000	900000	1080000	864000		795	435	0	705
Training	Ajaigarh	Devendranagar	Pawai	Shahnagar
	113835	60875	0	222675			Total Active Peer Educators (2019-20)
							Ajaigarh	Devendranagar	Pawai	Shahnagar	Gunnor	Amanganj	Total PE in Panna
Aministration Cost (NGO) 2019-20						Active PE per block	310	362	358	384	228	296	1938
NGO Admin Costs	Ajaigarh	Devendranagar	Pawai	Shahnagar		Total active saaathiya Brigade members	8479	8155	10144	6868						Total Programme cost for Panna
Training	11383	6087	0	22268		Total denominator	8789	8517	10502	7252						Programme Activity		2019-2020	2020-21	Percentage Change
Supportive Supervision	96000	100000	120000	96000		Total PE incentive per block	153727	179513	177529	190423						Human Resource Cost		4.62192e+06	4853750	0.05
Total expenditure	107383	106087	120000	118268		total incentive (Panna 2019-20	961039									Monitoring		58237.8	63969.4	0.098
						Per PE incentive	495.892
																Meetings		683735	3250	0.995
							Total Programme cost for Panna									Training		397385		1
							Programme Activity		2019-2020	2020-21						Administrative cost		451738	412000	0.087
							Human Resource Cost		913917	4853750	3.93983e+06	0	0.05			Total Cost		6.21301e+06	5.33297e+06
							Monitoring		3.77174e+06	63969.4	-3.70777e+06	-98.304	0.098
							Meetings		683735	3250	-680485	-99.5247	0.995
							Training		397385		-397385	-100	1
							Administrative cost		451738	412000	-39738	-8.79669	0.087
							Total Cost		6.21851e+06	5.33297e+06	-885543	-14.2404
District	Block	Human Resource Cost	Monitoring	Training	Meetings	Administrative cost	PE incentive	PE kit cost	Year
1	Ajaigarh	182542	875282	113835	89815	107383	153727	26500	1
1	Devendranagar	77300	918757	60875	245460	106087	179513	14500	1
1	Pawai	282342	1.09829e+06	0	220455	120000	177529	0	1
1	Shahnagar	225892	879404	222675	128005	118268	190423	23500	1
2	Hindoriya	462529	17908.3	0	2400	36000	0	0	2
2	Jabera	390481	14389.6	0	281.25	36000	0	0	2
2	Patera	457481	15983.3	0	1687.5	36000	0	0	2
2	Pathariya	448346	12827.1	0	1000	36000	0	0	2
1	Ajaigarh								2
1	Devendranagar								2
1	Pawai								2
1	Shahnagar								2					S	P	D	A
						A	D	P	S				No. of new PE selected.(From April 2019-March 2020)	47	0	29	53
						795	435	0	705
				Total Programme cost for Panna (2019-2020)									After new data and discussion on 10% mentors salaryon Hr And 90% on Moni
					BLOCKS
				Programme Activity	Ajaigarh	(%)	Devendranagar	(%)	Pawai	(%)	Shahnagar	(%)	Average Cost	(%)
				Human Resource Cost	182542	11.7839	223142	12.7631	282342	14.8709	225892	12.6326	228479	13.0855
				Monitoring	875282	56.5032	918757	52.5504	1.09829e+06	57.847	879404	49.1791	942934	54.0038
				Meetings	89815	5.79795	245460	14.0397	220455	11.6113	128005	7.15845	170934	9.78973
				Training	113835	7.34854	60875	3.48189	0	0	222675	12.4527	99346.2	5.68977
				Administrative cost	107383	6.93204	106087	6.06789	120000	6.32038	118268	6.61392	112934	6.468
				PE Kits Costs	26500	1.71069	14500	0.829361	0	0	23500	1.3142	16125	0.923513
				Total PE incentive	153727	9.92371	179513	10.2677	177529	9.35044	190423	10.649	175298	10.0397
				Total cost	1.54908e+06		1.74833e+06		1.89862e+06		1.78817e+06		1.74605e+06
				Per unit cost (PE+AEP)	176.252		205.276		180.787		246.576		202.223
				Per unit cost (AEP)	182.696		214.388		187.167		260.362		211.153
				Per unit cost (PE)	4997.04		4829.65		5303.41		4656.68		4946.7
					Total Active Peer Educators (2019-20)
					Ajaigarh	Devendranagar	Pawai	Shahnagar	Gunnor	Amanganj	Total PE in Panna
				Active PE per block	310	362	358	384	228	296	1938
				Total active saaathiya Brigade members	8479	8155	10144	6868
				Total denominator	8789	8517	10502	7252
				Total PE incentive per block	153727	179513	177529	190423
				total incentive (Panna 2019-20	961039
				Per PE incentive	495.892

## Sheet: Calculation 2020-21
Total Programme cost for Panna (2020-2021)						Total Programme cost for Panna (2020-2021)										Total Programme cost for Panna (2020-2021)
	BLOCKS						BLOCKS										BLOCKS
Programme Activity	Ajaigarh	Devendranagar	Pawai	Shahnagar	TOTAL COST	Programme Activity	Ajaigarh	(%)	Devendranagar	.(%)	Pawai	.(%)	Shahnagar	.(%)		Programme Activity	Ajaigarh	(%)	Devendranagar	.(%)	Pawai	.(%)	Shahnagar	.(%)
Human Resource Cost	262000	271500	349800	262450	1145750	Human Resource Cost	262000	21.1758	271500	20.9908	349800	22.2606	262450	21.133		Human Resource Cost	1126000	91.0075	1171500	90.5736	1429800	90.9897	1126450	90.7039
Monitoring	878011	921424	1.10096e+06	882574	3.78297e+06	Monitoring	878011	70.9641	921424	71.2391	1.10096e+06	70.0631	882574	71.0665		Monitoring	14011.1	1.13243	21423.6	1.65635	20961.1	1.33392	18573.6	1.49558
Meetings	1250	500	625	875	3250	Meetings	1250	0.10103	500	0.0386571	625	0.0397738	875	0.0704566		Meetings	1250	0.10103	500	0.0386571	625	0.0397738	875	0.0704566
Administrative cost	96000	100000	120000	96000	412000	Administrative cost	96000	7.75907	100000	7.73142	120000	7.63657	96000	7.7301		Administrative cost	96000	7.75907	100000	7.73142	120000	7.63657	96000	7.7301
Total Cost	1.23726e+06	1.29342e+06	1.57139e+06	1.2419e+06	5.34397e+06	Total Cost	1.23726e+06		1.29342e+06		1.57139e+06		1.2419e+06			Total Cost	1.23726e+06		1.29342e+06		1.57139e+06		1.2419e+06
						PE Incentives Cost	244966		270752		364519		251999			PE Incentives Cost	244966		270752		364519		251999
						Total Actual cost (w Ince cost	1.48223e+06	0	1.56418e+06	0	1.93591e+06	0	1.4939e+06			Total Actual cost (w Ince cost	1.48223e+06	0	1.56418e+06	0	1.93591e+06	0	1.4939e+06
10%mentors salry added to block level staff	96000	100000	120000	96000		Per Unit Cost	168.857		161.222		148.209		165.437			Per Unit Cost	168.857		161.222		148.209		165.437
HR	Ajaigarh	Devendranagar	Pawai	Shahnagar
Community Level	126800	121200	174600	103200
B level	99200	114300	139200	123250	here added the mentors
D level	36000	36000	36000	36000		Total no. of active PE in 2020-21
Total HR	262000	271500	349800	262450			Ajaigarh	Devendranagar	Pawai	Shahnagar	Gunnor	Amanganj	Total PE active		Total incentive
							418	462	622	430	228	380	2540		1488551
Meetings	Ajaigarh	Devendranagar	Pawai	Shahnagar										Per PE Incentive	586.044
	1250	500	625	875			Total number of aolescent Brigade member (2020-21)
	960000	1000000	1200000	960000			Ajaigarh	Devendranagar	Pawai	Shahnagar
Monitoring	Ajaigarh	Devendranagar	Pawai	Shahnagar			8360	9240	12440	8600		38640
B level	864650	908062	1087600	869212
D level	13361.1	13361.1	13361.1	13361.1		total AEP +PE	8778	9702	13062	9030
Total	878011	921424	1.10096e+06	882574
90% mentors salry added to B level	864000	900000	1080000	864000
Training	Ajaigarh	Devendranagar	Pawai	Shahnagar
	0	0	0	0			Total Programme Cost : Block Ajaigarh (2020-21)				Total Programme Cost : Block Devendranagar (2020-21)				Total Programme Cost : Block Pawai (2020-21)				Total Programme Cost : Block Shahnagar (2020-21)
	Aministration Cost (NGO) 2020-21						Programme Activity	Ajaigarh	.(%) (%)		Programme Activity	Devendranagar	.(%)		Programme Activity	Pawai	.(%)		Programme Activity	Shahnagar	.(%)
NGO Admin Costs	Ajaigarh	Devendranagar	Pawai	Shahnagar
Training	0	0	0	0			Human Resource Cost	262000	21.1758		Human Resource Cost	271500	20.9908		Human Resource Cost	349800	22.2606		Human Resource Cost	262450	21.133
Supportive Supervision	96000	100000	120000	96000			Monitoring	878011	70.9641		Monitoring	921424	71.2391		Monitoring	1.10096e+06	70.0631		Monitoring	882574	71.0665
Total expenditure	96000	100000	120000	96000			Meetings	1250	0.10103		Meetings	500	0.0386571		Meetings	625	0.0397738		Meetings	875	0.0704566
							Administrative cost	96000	7.75907		Administrative cost	100000	7.73142		Administrative cost	120000	7.63657		Administrative cost	96000	7.7301
							Total Cost	1.23726e+06			Total Cost	1.29342e+06			Total Cost	1.57139e+06			Total Cost	1.2419e+06
Total Programme cost for Panna (2020-2021)
	BLOCKS
Programme Activity	Ajaigarh	Devendranagar	Pawai	Shahnagar	Total							A	D	P	S
												1200	1170	2700	900
Human Resource Cost	1178500	1224000	1482300	1178950	5063750
Monitoring	11261.1	18673.6	18211.1	15823.6	63969.4
Meetings	1250	500	625	875	3250
Training					0
Administrative cost	96000	100000	120000	96000	412000
Total Cost	1.28701e+06	1.34317e+06	1.62114e+06	1.29165e+06	5.54297e+06
						District	Block	Human Resource Cost	Monitoring	Training	Meetings	Administrative cost	PE incentive	PE kit cost	Year
	20-21					1	Ajaigarh	1.04654e+06	11281.9	113835	89815	107383	153727	26500	1
	BLOCK NAME					1	Devendranagar	1077300	18756.9	60875	245460	106087	179513	14500	1
	Shahnagar	Pawai	Devendranagar	Ajaigarh		1	Pawai	1.36234e+06	18294.4	0	220455	120000	177529	0	1
No. of ASHAs involved in RKSK (From April 2020-March 2021)	18	311	231	209		1	Shahnagar	1.08989e+06	15404.4	222675	128005	118268	190423	23500	1
No. of ASHA faciliataors involved in RKSK(From April 2020-March 2021)	215	29	21	22		2	Hindoriya	462529	17908.3	0	2400	36000	0	0	2
No. of ANM involved in RKSK (From April 2020-March 2021)						2	Jabera	390481	14389.6	0	281.25	36000	0	0	2
No. of Mentors involved in RKSK (From April 2020-March 2021)	8	12	10	8		2	Patera	457481	15983.3	0	1687.5	36000	0	0	2
No. of new PE selected.(From April 2020-March 2021)	60	180	78	80		2	Pathariya	448346	12827.1	0	1000	36000	0	0	2
						1	Ajaigarh	262000	878011	0	1250	96000	244966	0	2
						1	Devendranagar	271500	921424	0	500	100000	270752	0	2
						1	Pawai	349800	1.10096e+06	0	625	120000	364519	0	2
						1	Shahnagar	262450	882574	0	875	96000	251999	0	2
	Ater additional data	Total Programme cost for Panna (2020-2021)
			BLOCKS
		Programme Activity	Ajaigarh	(%)	Devendranagar	(%)	Pawai	(%)	Shahnagar	(%)	Average Costs	% Share
		Human Resource Cost	262000	17.6761	271500	17.3574	349800	18.0691	262450	17.5681	286438	17.6917
		Monitoring	878011	59.2359	921424	58.9079	1.10096e+06	56.8706	882574	59.0786	945742	58.4134
		Meetings	1250	0.0843325	500	0.0319657	625	0.0322846	875	0.0585716	812.5	0.0501837
		Administrative cost	96000	6.47674	100000	6.39314	120000	6.19865	96000	6.42614	103000	6.36175
		PE Incentives Cost	244966	16.5269	270752	17.3096	364519	18.8294	251999	16.8685	283059	17.483
		Total cost	1.48223e+06		1.56418e+06		1.93591e+06		1.4939e+06		1.61905e+06
		Per Unit Cost (PE+AEP)	168.857		161.222		148.209		165.437		160.931
		Per Unit Cost (AEP)	177.3		169.283		155.619		173.709		168.978
		Per Unit Cost (PE)	3546		3385.66		3112.39		3474.18		3379.56
		Total no. of active PE in 2020-21
			Ajaigarh	Devendranagar	Pawai	Shahnagar	Average 4 blocks
		PE	418	462	622	430	483
		AEP	8360	9240	12440	8600	9660
		PE+AEP	8778	9702	13062	9030	10143

## Sheet: without NGO costs_05062023
Total Programme cost for Panna (2020-2021)						Total Programme cost for Panna (2020-2021)										Total Programme cost for Panna (2020-2021)
	BLOCKS						BLOCKS										BLOCKS
Programme Activity	Ajaigarh	Devendranagar	Pawai	Shahnagar	TOTAL COST	Programme Activity	Ajaigarh	(%)	Devendranagar	.(%)	Pawai	.(%)	Shahnagar	.(%)		Programme Activity	Ajaigarh	(%)	Devendranagar	.(%)	Pawai	.(%)	Shahnagar	.(%)
Human Resource Cost	163167	168667	226967	163617	722417	Human Resource Cost	163167	59.4571	168667	58.0428	226967	61.5832	163617	58.6302		Human Resource Cost	1126000	91.0075	1171500	90.5736	1429800	90.9897	1126450	90.7039
Monitoring	14011.1	21423.6	20961.1	18573.6	74969.4	Monitoring	14011.1	5.10557	21423.6	7.37245	20961.1	5.68741	18573.6	6.65565		Monitoring	14011.1	1.13243	21423.6	1.65635	20961.1	1.33392	18573.6	1.49558
Meetings	1250	500	625	875	3250	Meetings	1250	0.455493	500	0.172064	625	0.169582	875	0.313547		Meetings	1250	0.10103	500	0.0386571	625	0.0397738	875	0.0704566
Administrative cost	96000	100000	120000	96000	412000	Administrative cost	96000	34.9819	100000	34.4127	120000	32.5598	96000	34.4006		Administrative cost	96000	7.75907	100000	7.73142	120000	7.63657	96000	7.7301
Total Cost	274428	290590	368553	279065	1.21264e+06	Total Cost	274428		290590		368553		279065			Total Cost	1.23726e+06		1.29342e+06		1.57139e+06		1.2419e+06
						PE Incentives Cost	244966		270752		364519		251999			PE Incentives Cost	244966		270752		364519		251999
						Total Actual cost (w Ince cost	519394	0	561342	0	733072	0	531064			Total Actual cost (w Ince cost	1.48223e+06	0	1.56418e+06	0	1.93591e+06	0	1.4939e+06
						Per Unit Cost	59.17		57.8584		56.1225		58.8111			Per Unit Cost	168.857		161.222		148.209		165.437
HR	Ajaigarh	Devendranagar	Pawai	Shahnagar
Community Level	126800	121200	174600	103200
B level	3200	14300	19200	27250
D level	33166.7	33166.7	33166.7	33166.7		Total no. of active PE in 2020-21
Total HR	163167	168667	226967	163617			Ajaigarh	Devendranagar	Pawai	Shahnagar	Gunnor	Amanganj	Total PE active		Total incentive
							418	462	622	430	228	380	2540		1488551
Meetings	Ajaigarh	Devendranagar	Pawai	Shahnagar										Per PE Incentive	586.044
	1250	500	625	875			Total number of aolescent Brigade member (2020-21)
							Ajaigarh	Devendranagar	Pawai	Shahnagar
Monitoring	Ajaigarh	Devendranagar	Pawai	Shahnagar			8360	9240	12440	8600		38640
B level	650	8062.5	7600	5212.5
D level	13361.1	13361.1	13361.1	13361.1		total AEP +PE	8778	9702	13062	9030
Total	14011.1	21423.6	20961.1	18573.6
Training	Ajaigarh	Devendranagar	Pawai	Shahnagar
	0	0	0	0			Total Programme Cost : Block Ajaigarh (2020-21)				Total Programme Cost : Block Devendranagar (2020-21)				Total Programme Cost : Block Pawai (2020-21)				Total Programme Cost : Block Shahnagar (2020-21)
	Aministration Cost (NGO) 2020-21						Programme Activity	Ajaigarh	.(%) (%)		Programme Activity	Devendranagar	.(%)		Programme Activity	Pawai	.(%)		Programme Activity	Shahnagar	.(%)
NGO Admin Costs	Ajaigarh	Devendranagar	Pawai	Shahnagar
Training	0	0	0	0			Human Resource Cost	163167	59.4571		Human Resource Cost	168667	58.0428		Human Resource Cost	226967	61.5832		Human Resource Cost	163617	58.6302
Supportive Supervision	96000	100000	120000	96000			Monitoring	14011.1	5.10557		Monitoring	21423.6	7.37245		Monitoring	20961.1	5.68741		Monitoring	18573.6	6.65565
Total expenditure	96000	100000	120000	96000			Meetings	1250	0.455493		Meetings	500	0.172064		Meetings	625	0.169582		Meetings	875	0.313547
							Administrative cost	96000	34.9819		Administrative cost	100000	34.4127		Administrative cost	120000	32.5598		Administrative cost	96000	34.4006
							Total Cost	274428			Total Cost	290590			Total Cost	368553			Total Cost	279065
Total Programme cost for Panna (2020-2021)
	BLOCKS
Programme Activity	Ajaigarh	Devendranagar	Pawai	Shahnagar	Total							A	D	P	S
												1200	1170	2700	900
Human Resource Cost	1178500	1224000	1482300	1178950	5063750
Monitoring	11261.1	18673.6	18211.1	15823.6	63969.4
Meetings	1250	500	625	875	3250
Training					0
Administrative cost	96000	100000	120000	96000	412000
Total Cost	1.28701e+06	1.34317e+06	1.62114e+06	1.29165e+06	5.54297e+06
						District	Block	Human Resource Cost	Monitoring	Training	Meetings	Administrative cost	PE incentive	PE kit cost	Year
	20-21					1	Ajaigarh	1.04654e+06	11281.9	113835	89815	107383	153727	26500	1
	BLOCK NAME					1	Devendranagar	1077300	18756.9	60875	245460	106087	179513	14500	1
	Shahnagar	Pawai	Devendranagar	Ajaigarh		1	Pawai	1.36234e+06	18294.4	0	220455	120000	177529	0	1
No. of ASHAs involved in RKSK (From April 2020-March 2021)	18	311	231	209		1	Shahnagar	1.08989e+06	15404.4	222675	128005	118268	190423	23500	1
No. of ASHA faciliataors involved in RKSK(From April 2020-March 2021)	215	29	21	22		2	Hindoriya	462529	17908.3	0	2400	36000	0	0	2
No. of ANM involved in RKSK (From April 2020-March 2021)						2	Jabera	390481	14389.6	0	281.25	36000	0	0	2
No. of Mentors involved in RKSK (From April 2020-March 2021)	8	12	10	8		2	Patera	457481	15983.3	0	1687.5	36000	0	0	2
No. of new PE selected.(From April 2020-March 2021)	60	180	78	80		2	Pathariya	448346	12827.1	0	1000	36000	0	0	2
						1	Ajaigarh	163167	14011.1	0	1250	96000	244966	0	2
						1	Devendranagar	168667	21423.6	0	500	100000	270752	0	2
						1	Pawai	226967	20961.1	0	625	120000	364519	0	2
						1	Shahnagar	163617	18573.6	0	875	96000	251999	0	2
	Ater additional data	Total Programme cost for Panna without NGO Costs (2020-2021)
			BLOCKS
		Programme Activity	Ajaigarh	(%)	Devendranagar	(%)	Pawai	(%)	Shahnagar	(%)	Average Costs	% Share
		Human Resource Cost	163167	38.5378	168667	36.56	226967	37.0212	163617	37.6075	180604	37.3753
		Monitoring	14011.1	3.30924	21423.6	4.64375	20961.1	3.41903	18573.6	4.26917	18742.4	3.87865
		Meetings	1250	0.295233	500	0.108379	625	0.101946	875	0.20112	812.5	0.168144
		PE Incentives Cost	244966	57.8577	270752	58.6879	364519	59.4578	251999	57.9222	283059	58.5779
		Total cost	423394		461342		613072		435064		483218
		Per Unit Cost (PE+AEP)	168.857		161.222		148.209		165.437		160.931
		Per Unit Cost (AEP)	50.6452		49.9288		49.2823		50.5888		50.1113
		Per Unit Cost (PE)	1012.9		998.577		985.646		1011.78		1002.23

## Sheet: without NGO District
2020-21																			2019-20
	Personnel	Total no. of visits for monitoring in a year	Total no. of Visits for RKSK	Time contribtion for PE prog in each visit	Mobility Support )	Total time contribution for monitoring in a year(in min)	Total time contri for moni of PE prog in a year (in min)	Total apportioned cost from mobility support in a year per block	Gross salary per month (INR)	Per day's salary	Per hour's salary	Apportioned salary from monitoring for a visit	Total appotioned cost for salary for an year per block	Total monitoring cost for a year per block	Time contri for the prog apart from monitoring in a month (hr)	HR cost (yearly) for a block	Final Total HR Cost		S. No	Personnel	Total no. of visits for monitoring in a year	D. Total no. of Visits for RKSK in a year	Time contribtion for PE prog in each visit(min)	Mobility Support (yearly)	Total time contribution for monitoring in a year(in min)	Total time contri for moni of PE prog in a year (in min)	Total apportioned cost from mobility support in a year per block	Gross salary per month (INR)	Per hour's salary	Apportioned salary from monitoring for a visit	Total appotioned cost for salary for an year per block	Total monitoring cost for a year	Time contri for the prog apart from monitoring in a month (hr)	HR Cost yearly Per Block	Final Total HR Cost	Remarks
CHMO	1	24	24	20min	240000	11520	480	1666.67	150000	5000	625	208.333	833.333	2500	12	15000	15000		CHMO	1	24	24	20	240000	11520	480	1666.67	150000	625	208.333	833.333	2500	12	15000	15000	1)For the DPM and CHMO , the total no of annual visits are taken into account while calculating the monitiring visits and divided by 6 for there are 6 blocks in which programme is being implemented. The data is recorded as per DPM Panna (2019-21) conversation with sir. 2)As per the data shared by the NGO, the salary has been mentioned for the Prog Coordinator . The monthly salary is Rs 17000. How…
DPM	1	24	24	20 min	240000	11520	480	1666.67	65000	2166.67	270.833	90.2778	361.111	2027.78	12	6500	6500		DPM	1	24	24	20	240000	11520	480	1666.67	65000	270.833	90.2778	361.111	2027.78	12	6500	6500
RKSK Coordinator	1	120	120	120min	72000	57600	14400	3000	35000	1166.67	145.833	291.667	5833.33	8833.33	8hrs per day	17500	11666.7		RKSK Coordinator	1	120	120	120	36000	57600	14400	1500	28000	116.667	233.333	4666.67	6166.67	8hrs per day	14000	9333.33
Total														13361.1			33166.7		Total													10694.4			30833.3
check CHMOand dpm damoh
should we add for chmo and dpm , similarly for block level staff.
						Given:
						Gross salary per month = 150000
						Total mobility support in a year = 240000
						Total no of monitoring visists in a year =24
						Total time contributed for monitoring of PE programme in 1 visit =20min
						Total time contributed for monitoring of all programmes in ayear = 8 hrs * 24 visits
						11520
						Total time contributed for monitoring of PE programme in 24 visits =20min * 24 visits
						480
						1) Total mobility cost apportioned from mobility support for a year per block = Total mobility support cost/Total time utilized for monitoring of all programme* Total time contri for moni. of PE prog/6
						240000/11520*480/6 …............ (1)
						1666.67
						2) Total apportioned cost from the salary for monitoring of PE prog for an year per block = Salary of 480 min. /6
						Rs 833.33….....................(2)
						Hence Total apportioned monitoring cost for a block = (1) + (2)
						2500

## Sheet: Meeting 
Meeting Cost for 2019-20 (PANNA)												Meeting Cost for 2020-21 (PANNA)
Sl. no	Name of the meeting /Workshop	Level (District/Block/Sub centre)	No of meetings in a year	No. of participants in the meeting	Duration of meeting in hrs.	Expenditure (incurred during meetings)				Total cost for the year		Sl. no	Name of the meeting /Workshop	Level (District/Block/Sub centre)	No of meetings in a year	No. of participants in the meeting	Duration of meeting in hrs.	Expenditure (incurred during meetings)
						Venue Cost	Accommodation Cost (If any)	Transport (TA/DA to ASHA and PE)	Total Cost									Venue Cost	Accommodation Cost (If any)	Transport	Total Cost
								cost (if any)												cost (if any)
Ajaigarh	Block Level Meeting /samiksha Baithak	Block	11		4				1375	89815		Ajaigarh	Block Level Meeting /samiksha Baithak	Block	10		4				1250
	AFC		55	1661	3.5			40 per PE/ASHA	88440				AFC		0
Devendranagar	Block Level Meeting /samiksha Baithak	Block	12		4				1500	245460		Devendranagar	Block Level Meeting /samiksha Baithak	Block	4		4				500
	AFC		216	3939	3.5			40 per PE/ASHA	243960				AFC		0
Pawai	Block Level Meeting /samiksha Baithak	Block	11		4				1375	220455		Pawai	Block Level Meeting /samiksha Baithak	Block	5		4				625
	AFC		143	4047	3.5			40 per PE/ASHA	219080				AFC		0
Shahnagar	Block Level Meeting /samiksha Baithak	Block	9		4				1125	128005		Shahnagar	Block Level Meeting /samiksha Baithak	Block	7		4				875
	AFC		108	2092	3.5			40 per PE/ASHA	126880				AFC		0
Total										683735		Total									3250
	A	D	P	S									A	D	P	S
	89815	245460	220455	128005									1250	500	625	875

## Sheet: Training
Training Cost for 2020-21 (PANNA)														Training Cost for 2019-20 (PANNA)
Name of the Block	Level of training	Duration of training (in hrs.)	No of trainees trained	Type of Trainer - (Hired/ department personnel)	Expenditure incurred in Training Activities.									Name of the Block	Level of training	Duration of training (in hrs.)	No of trainees trained	Type of Trainer - (Hired/ department personnel)	Expenditure incurred in Training Activities.
	(State level/District level/Block level/ any other training)				Trainer (TA/DA, Accomodation etc.)	Trainees (TA/DA, Accomodation etc.)	Development of training materials	Printing of training material	Venue cost	Any other cost (Food expenses etc.)	Total Cost				(State level/District level/Block level/ any other training)				Trainer (TA/DA, Accomodation etc.)	Trainees (TA/DA, Accomodation etc.)	Development of training materials	Printing of training material	Venue cost	Any other cost (Food expenses etc.)	Total Cost
Ajaigarh	B										0			Ajaigarh	B										113835
Devendranagar	B										0			Devendranagar	B										60875
Pawai	B										0			Pawai	B										0
Shahnagar	B										0			Shahnagar	B										222675
														Total											397385
NOTE: No trainings were conducted in this year.

## Sheet: Sheet1
										Total Programme cost for Panna (2019-2020)
	Total Programme cost for Panna (2019-2020)	0
	0	BLOCKS								Programme Activity	(%)	(%)	(%)	(%)
	Programme Activity	Ajaigarh	Devendranagar	Pawai	Shahnagar
										Human Resource Cost	76.5306	72.3233	79.219	69.2932	74.3415
	Human Resource Cost	182542	223142	282342	225892	228479				Monitoring	0.724466	1.11929	0.983851	0.891965	0.929893
	Monitoring	875282	918757	1.09829e+06	879404	942934				Meetings	6.56791	15.8061	12.8193	8.13831	10.8329
	Meetings	89815	245460	220455	128005	170934				Training	8.32443	3.91997	0	14.1572	6.60041
	Training	113835	60875	0	222675	99346.2				Administrative cost	7.85261	6.83134	6.9779	7.51925	7.29527
	Administrative cost	107383	106087	120000	118268	112934				Total Cost
	Total Cost	1.36886e+06	1.55432e+06	1.72109e+06	1.57424e+06	1.55463e+06				Per unit cost
	Per unit cost	176.252	205.276	180.787	246.576
	Total Programme cost for Panna (2019-2020)
		BLOCKS
	Programme Activity	Ajaigarh	(%)	Devendranagar	(%)	Pawai	(%)	Shahnagar	(%)
	Human Resource Cost	1.04654e+06	76.5306	1.12314e+06	72.3233	1.36234e+06	79.219	1.08989e+06	69.2932
	Monitoring	9906.94	0.724466	17381.9	1.11929	16919.4	0.983851	14029.4	0.891965
	Meetings	89815	6.56791	245460	15.8061	220455	12.8193	128005	8.13831
	Training	113835	8.32443	60875	3.91997	0	0	222675	14.1572
	Administrative cost	107383	7.85261	106087	6.83134	120000	6.9779	118268	7.51925
	Total Cost	1.36748e+06		1.55295e+06		1.71972e+06		1.57287e+06
	Per unit cost	1720.1		3569.99		0		2231.02

## Sheet: Final table
	Table 1: Total Programme cost for Panna (2019-2020)							Table 1: Total Programme cost for Panna (2019-2020)							Table 2: Total Programme cost for Panna (2020-2021)							Table 2: Total Programme cost for Panna (2020-2021)
	Programme Activity	BLOCKS							BLOCKS							BLOCKS							BLOCKS
		Ajaigarh	Devendranagar	Pawai	Shahnagar	Average cost		Programme Activity	Ajaigarh	Devendranagar	Pawai	Shahnagar			Programme Activity	Ajaigarh	Devendranagar	Pawai	Shahnagar	Average Cost		Programme Activity	Ajaigarh	Devendranagar	Pawai	Shahnagar
	Human Resource Cost	1046541.67 (76.53%)	1123141.67 (72.32%)	1362341.67 (79.22%)	1089891.67 (69.29%)	1.15548e+06		Human Resource Cost	1.04654e+06	1.12314e+06	1.36234e+06	1.08989e+06
	Monitoring	9906.94 (0.7%)	17381.94 (1.12%)	16919.44(0.98%)	14029.44(0.89%)	14559.4		Monitoring	9906.94	17381.9	16919.4	14029.4			Human Resource Cost	1126000 (91.21%)	1171500 (90.77%)	1429800 (91.15%)	1126450 (90.91%)	1.21344e+06		Human Resource Cost	1126000	1171500	1429800	1126450
	Meetings	89815 (6.57%)	245460 (15.81%)	220455(12.82%)	128005(8.14%)	170934		Meetings	89815	245460	220455	128005			Monitoring	11261.11 (0.91%)	18673.61 (1.45%)	18211.11 (1.16%)	15823.61 (1.28%)	15992.4		Monitoring	11261.1	18673.6	18211.1	15823.6
	Training	113835 (8.32%)	60875 (3.92%)	0	222675(14.16%)	99346.2		Training	113835	60875	0	222675			Meetings	1250 (0.10%)	500 (0.04%)	625 (0.04%)	875 (0.07%)	812.5		Meetings	1250	500	625	875
	Administrative cost	107383 (7.85%)	106087 (6.83%)	120000(6.98%)	118268(7.52%)	112934		Administrative cost	107383	106087	120000	118268			Administrative cost	96000 (7.78%)	100000 (7.75%)	120000 (7.65%)	96000 (7.75%)	103000		Administrative cost	96000	100000	120000	96000
	Total Cost	1.36748e+06	1.55295e+06	1.71972e+06	1.57287e+06	1.55325e+06		Total Cost	1.36748e+06	1.55295e+06	1.71972e+06	1.57287e+06			Total Cost	1.23451e+06	1.29067e+06	1.56864e+06	1.23915e+06	1.33324e+06		Total Cost	1.23451e+06	1.29067e+06	1.56864e+06	1.23915e+06
	Per unit cost							Per unit cost	1720.1	3569.99	0	2231.02			Per Unit Cost							Per Unit Cost	1028.76	1103.14	580.98	1376.83

[truncated: 5 more sheets: HR +Moni  Block Level corrected, Sheet2, Admin Cost., New Calculation, Footfall]
