# Supplementary material for: Cost of providing Peer Education programme in the National Adolescent Health programme and its variations across two states of India.
Source: Research Square preprint supplement (doi:10.21203/rs.3.rs-8470187/v1), 2026-01-20
Supplement: Supplementary file 3 [file a441e09b994f7fcfc6c69641.docx]

**Annexure 5**

**Details of Micro cost data and calculation**

**Human Resource Cost**: The Human Resource cost comprised of the cost incurred due to the various personnel be at district, block or community level who contribute their time for the programme. The involvement of staff in the Peer Educator Programme varies by the fact that some of the human resources are full time engaged in Peer Educator Programme e.g., the mentors at the field level who are appointed by the NGO in Madhya Pradesh. The other human resource involved in the programme are not exclusive to the programme but are government staff who contribute a portion of their time for the programme.

Hence, for the costing exercise, two kinds of personnel were identified, those who contribute their full time to the programme (e.g., the RKSK coordinator and mentors) and those who contribute a part of their time for the programme (like the medical officer, ASHA supervisor, ANM).

For estimation of HR Costs, the salary of the human resource staff involved in the programme was considered for the financial year. This was apportioned according to the time they contribute for the programme in various activities of implementation, monitoring, planning and supervision of the programme. For instance, in Damoh, a block level staff provides 8hrs of his/her time for the programme implementation in a month; hence, we apportioned the cost of 8 hrs of his/her total time from salaries.

The involved Human Resource differ in the two states as per the implementation model as Maharashtra follows a Govt led model and MP: an NGO led model. In Maharashtra, the costs for HR included the District Health officer (DHO), Reproductive and Child Health Officer (RCHO), DPM, RKSK coordinator cum counsellor, Medical Officers, BCM, ASHA Facilitator/ Block Facilitator, and ANMs.

Additionally, we also included incentives for ASHA under the HR costs. For selection of Peer Educators, there is a provision of incentive of Rs 100 to ASHA for each Peer Educator selection. Hence, the incentives costs disbursed to ASHAs during the reference period of the study are also taken into account while estimating the cost for the programme.

Since the programme is an NGO led model in MP, we included the HR cost from the implementing NGO as well. From NGO, the identified staff for the programme include Programme Coordinator and mentors. This also included the government officials ASHA/ANM, medical officers involved in the process. The apportioning was done based upon the personal and telephonic interviews with various staff engaged in monitoring and implementing the peer educator programme.

**Monitoring Cost**:

Monitoring costs are defined as costs associated with the monitoring of the programme activities by the district and block level officials. The monitoring cost comprised of the time contributed for the monitoring in the Peer educator programme. Accordingly, there were 2 types of cost, one apportioned from the mobility support/ TA/DA of the personnels for programme monitoring and another from the cost apportioned from their salary utilized during the monitoring.

While calculation of monitoring costs, we have used the following steps:

1. Firstly, we found the total mobility support for different HR personnels involved in monitoring.
2. Then we asked the total number of visits made by each personnel for monitoring. Additionally, we asked the total number of visits in which PE programme is monitored and the time contributed during each monitoring visit for PE programme. Accordingly, we apportioned monitoring costs from their mobility support and apportioned the same from their respective salaries as well. For instance, in Panna, a block level official contributed 30 min for monitoring in each visit, so the cost of 30 min was apportioned from their mobility and their salaries respectively for that visit.

Finally, we added up the cost of monitoring apportioned from the mobility support and the cost of monitoring apportioned from the salaries to calculate the total cost of monitoring.

1. For District level staff, the time contribution and the salaries apportioned were further divided among the number of blocks where the Programme is implemented.

**Training/ Capacity Building Costs**:

It involved the costs associated with the training of the peer educator training for the peer educator.

In Maharashtra, the staff involved in training included the ASHA Faciliataor, ASHA, Counsellors, block progarmme manager. The Peer Educator training is conducted by the NGO and we have collected the data from the implementing NGO for the same. The disaggregate cost on different training heads- hired cost for trainer, TA for the PE and ASHA, venue cost and food were not available and hence we included the lumpsum amount under training as reported by the NGOs.

In Maharashtra, the staff involved in training involves the MO, ANM, ASHA and ASHA Facilitator and it is conducted for 5 days. The disaggregate costs were not available for training in Maharashtra as well and hence we included the lumpsum amount as provided by the district office.

**Meeting Costs**: It included the expenditure incurred for conducting meetings specific to the Peer educator programme. The meetings included are the Block level monthly review meeting, and the Adolescent Friendly Club Meeting (AFC) which takes place at the sub centre level in MP. In Maharashtra, the AFC meetings were included.

In case of joint meetings, the cost of the meetings was apportioned according to the period for which the programme activities were discussed in the meeting. For instance, if the programme is discussed for 10% of the total time duration of the meeting, then 10% of the total cost of the meeting has been apportioned for the same.

For the block level Review meetings, the total time of the meeting has been divided into 4 parts for the 4 components of the RKSK programme namely WIFS, MHS, AFHC and PE programme which were reported by block and district level officials during our field visits. Hence, we apportioned the cost for PE programme accordingly.

**Administrative Cost**: The programme is run by NGOs in Madhya Pradesh, hence the administrative cost for the NGOs were also taken into account while estimating the costs. As per the Government guidelines, 10% of the total cost of each activity namely, training of Peer Educators, counselling activities by the counsellors of AFHC and supportive supervision by the mentors are marked as administration cost. For the study, we have considered the administrative cost of peer educator training and supportive supervision of mentors only as these components are specific to the Peer Educator programme.

**Incentives cost**: It comprise of the costs incurred for dispensing the incentives to the peer educators. The peer educators receive non- monetary incentives such as sports equipment, T shirt and comic books.

**Peer Educator Kit Costs**: Under the programme, the peer educators are provided with non-monetary incentives in the form of sports material, bags and T-shirt. These costs are also included in the costing exercise. Moreover, in Madhya Pradesh, PE kits are provided to each PE during the training, which contain comic books based on the 6 themes of adolescent health in RKSK, T-shirts and diaries for registering the adolescent group members. The cost of these kits was also included in the costing exercise. No such provision of Peer Educator kits was there in Maharashtra.
