# Supplementary material for: Cost of providing Peer Education programme in the National Adolescent Health programme and its variations across two states of India.
Source: Research Square preprint supplement (doi:10.21203/rs.3.rs-8470187/v1), 2026-01-20
Supplement: Supplementary file 4 [file cf739f52885107013325ff85.xlsx]

## Sheet: District level staff
Human Resource Cost for the year 2019-20																							Human Resource Cost for the year 2020-21
S. No	A. Personnel	B. No. of personnel	D. Total no of hours contributed in a month for PE programme apart from Monitoring(hrs)	G. Gross salary per month (INR)		Apportioned salary for a month	Total cost for a year	Total HR cost per block													Remarks		S. No	A. Personnel	B. No. of personnel	D. Total no of hours contributed in a month for RKSK	G. Gross salary per month (INR)		Per hour's salary	Apportioned salary for a Year	Total HR cost per block												Remarks
					Per hour's salary				Total number of visits for monitoring in a month	Total number of visits for monitoring in a Year	TC in each monitoring visit (in min)	TC for PE in 1 visit (in min)	TC for Pe prog in all visits (in min)	Total cost for monitoring apportioned from salary in a year	Total cost from apprtioned from salary for monitoring per block	Mobility support	Total time contributed for monitoring in all visits in a year	Cost apportioned for monitoring from m obility support	Total Cost apportioned for monitoring from mobility support per block	Total monitoring costs per block								Per day's salary				Total number of visits for monitoring in a month	Total number of visits for monitoring in a Year	TC in each monitoring visit (in min)	Total cost for monitoring apportioned from salary in a year	Total cost from apprtioned from salary for monitoring per block	Mobility support	Total time contributed for monitoring in all visits in a year	Total time contributed for monitorin PE prog in in a year	Cost apportioned for monitoring from m obility support	Total Cost apportioned for monitoring from mobility support per block	Total monitoring costs per block
1	DHO	1	2	162328	676.365	1352.73	16232.8	1082.18	7	84	40320	15	1260	14203.7	946.911	235200	40320	7350	490	1436.91			1	DHO		2	167508	5583.61	697.951	16750.8	1116.72	7	84	40320	14657	977.132	235200	40320	1260	7350	490	1467.13
2	RCH Officer	1	2	152850	636.874	1273.75	15285	1019	7	84	40320	15	1260	13374.3	891.623	235200	40320	7350	490	1381.62			2	RCH Officer		2	157728	5257.59	657.199	15772.8	1051.52	7	84	40320	13801.2	920.079	235200	40320	1260	7350	490	1410.08
3	DPM	1	2	30000	125	250	3000	200	4	48	23040	15	720	1500	100	235200	23040	7350	490	590			3	DPM		2	38000	1266.67	158.333	3800	253.333	4	48	23040	1900	126.667	235200	23040	720	7350	490	616.667
4	RKSK Coordinator	1	60	23500	97.9167	5875	70500	3760	8	96	46080	90	8640	14100	940	400*per visit	46080	9600	640	1580			4	RKSK Coordinator		60	24063	802.1	100.263	72189	3850.08	8	96	46080	14437.8	962.52	400 per visit		8640	9600	640	1602.52
								6061.18												4988.53											6271.65											5096.4

## Sheet: Training
Training Cost for 20219-20 : Nashik														Training Cost for 20219-20 : Nashik
Number of Training (PE TRAINING)	Level of training	Duration of training (in hrs.)	No of trainees trained	Type of Trainer - (Hired/ department personnel)	Expenditure incurred in Training Activities.									Number of Training (PE TRAINING)	Level of training	Duration of training (in hrs.)	No of trainees trained	Type of Trainer - (Hired/ department personnel)	Expenditure incurred in Training Activities.
	(State level/District level/Block level/ any other training)				Trainer (TA/DA, Accomodation etc.)	Trainees (TA/DA, Accomodation etc.)	Development of training materials	Printing of training material	Venue cost	Any other cost (Food expenses etc.)	Total Cost				(State level/District level/Block level/ any other training)				Trainer (TA/DA, Accomodation etc.)	Trainees (TA/DA, Accomodation etc.)	Development of training materials	Printing of training material	Venue cost	Any other cost (Food expenses etc.)	Total Cost
Dindori														Dindori
	Block										0				Block
Nandgaon														Nandgaon
	Block										0				Block
Sinner														Sinner
	Block										0				Block
Surgana														Surgana
	Block										0				Block

## Sheet: Incentives
	Incentives fo Peer Educators (2019-20)						Incentives fo Peer Educators (2020-21)
	Dind	Nand	Sinnar	Surgana			Dind	Nand	Sinnar	Surgana

## Sheet: BCM
Human Resource Cost for the year 2019-20 : Nashik															Human Resource Cost for the year 2019-20 : Nashik
S. No	A. Personnel	B. No. of personnel	Time contribution for PE programme programme in a month apart from moni (hr)	G. Gross salary per month (INR)	Per hour's salary				Apportioned salary for an year			Total moni cost for an year	Remarks		S. No	A. Personnel	B. No. of personnel	Time contribution for PE programme programme in a month apart from moni (hr)	G. Gross salary per month (INR)	Per hour's salary				Apportioned salary for an year			Total moni cost for an year
						HR COST for an year	TC moni in 1 visit for PE prog (in min)	Total number of visits for PE prog in a year		TA/DA per visit	Cost apportioned from TA/DA										HR COST for an year	TC moni in 1 visit for PE prog (in min)	Total number of visits for PE prog in a year		TA/DA per visit	Cost apportioned from TA/DA
Dindori	BCM	1	1	18000	75	900	30	24	900	305	457.5	1357.5			1	BCM	1	1	18000	75	900	30	24	900	305	457.5	1357.5
Nandgaon	BCM	1	5	17500	72.9167	4375	30	24	875	352.5	528.75	1403.75			2	BCM	1	5	18937.5	78.9062	4734.38	30	24	946.875	352.5	528.75	1475.62
Sinnar	BCM	1	5	17500	72.9167	4375	30	24	875	305	457.5	1332.5			3	BCM	1	5	18937.5	78.9062	4734.38	30	24	946.875	305	457.5	1404.38
Surgana	BCM	1	5	17000	70.8333	4250	30	24	850	400	600	1450			4	BCM	1	5	19875	82.8125	4968.75	30	24	993.75	400	600	1593.75
								900			1357.5
								4375			1403.75										900					1357.5
								4375			1332.5										4734.38					1475.62
								4250			1450										4734.38					1404.38
																					4968.75					1593.75

## Sheet: HR
Human Resource Cost for the year 2019-20 : NASHIK										Human Resource Cost for the year 2020-21 : NASHIK
S. No	A. Personnel	B. No. of personnel	Time contribution for PE programme programme in a month	G. Gross salary per month (INR)	Per day's salary	Per hour's salary	Apportioned salary for a year	Total cost for an year		S. No	A. Personnel	B. No. of personnel	Time contribution for PE programme programme in a month	G. Gross salary per month (INR)	Per day's salary	Per hour's salary	Apportioned salary for a month	Total cost for an year
BLOCK 1 : Dindori										BLOCK 1 : Dindori
1	MO	4	4	2*90000, 1*1lakh				72127.2		1	MO	4	4	1*80000,2*90000				66066.7
2	ASHA incentive							0		2	ASHA incentive							0		72127.2	66066.7		D1	D2	D3	D4
3	Asha F.	6	9	7850		32.7083	21195	21195		3	Asha F.	6	9	8475		35.3125		22882.5		42127.2	50200		80000	90000	90000	70333.3	70333.3
4	ANM (P)	12	4					117600		4	ANM (P)	12	4					123032		63000	56066.7		40000	70333.3	70333.3	70333.3
5	ANM (C)	2	4					6800		5	ANM (C)	2	4					7600		64654.4	52733.3		70000	70000	70000	70333.3
TOTAL								217722		TOTAL								219581					78000	45000	70333.3	70333.3
BLOCK 2 : Nandgaon										BLOCK 2 : Nandgaon																		330333	1376.39	5505.56
1	MO	3	4	1*40000, 1*90000				42127.2		1	MO	4	4	1*40000				50200												66066.7
2	ASHA incentive	0						0		2	ASHA incentive							0		219581	115461	152638	175036
3	Asha F.	3	9	7850				10597.5		3	Asha F.	3	9	8475				11441.2							263667
4	ANM (P)	5	4					47800		4	ANM (P)	5	4					47800
5	ANM (C)	2	4					6020		5	ANM (C)	2	4					6020
TOTAL								106545										115461							52733.3
BLOCK 3 : Sinner										BLOCK 3 : Sinner
1	MO	4	1	90000*2,70000*1,65000*1				15750		1	MO	4	4	70000*2,70000*1				56066.7
2	ASHA incentive							18400		2	ASHA incentive							0		219581	115461	152638	175036
3	Asha F.	4	5	7850				7850		3	Asha F.	4	9	8475				15255
4	ANM (P)	7						0		4	ANM(P)	7	4					66516
5	ANM (C)	5						0		5	ANM (C)	5	4					14800
TOTAL								42000										152638
BLOCK 4 : Surgana										BLOCK 4 : Surgana
1	MO	4	1	1*72000, 1*90000				13923		1	MO	4	4	1*78000, 1*45000				52733.3
2	ASHA incentive							43000		2	ASHA incentive							0
3	Asha F.	6	5	7850				11775		3	Asha F.	6	9	8475				22882.5
4	ANM (P)	9						0		4	ANM (P)	9	4					89400
5	ANM (C)	3						0		5	ANM (C)	3	4					10020
TOTAL								68698										175036

## Sheet: Meeting 
Meeting Cost for 2019-20												Meeting Cost for 2020-21
Name of the meeting	Level (District/Block/Sub centre)	No of meetings in a year	No. of participants in the meeting	Duration of meeting in hrs.	Expenditure (incurred during meetings)				Apportioned cost	Total cost for the year		Sl. no	Level (District/Block/Sub centre)	No. of meetings in a year	No. of participants in the meeting	Duration of meeting in hrs.	Expenditure (incurred during meetings)				Apportioned cost	Total cost for the year
					Venue Cost	Accommodation Cost (If any)	Transport	Total Cost									Venue Cost	Accommodation Cost (If any)	Transport	Total Cost
							cost (if any)												cost (if any)
Dindori												Dindori
AFC meeting	B	38								19000		AFC meeting	B	63								31500
Nandgaon												Nandgaon
AFC meeting	B	65								32500		AFC meeting	B	90								45000
Sinner												Sinner
AFC meeting	B									0		AFC meeting	B	162								81000
Surgana												Surgana
AFC meeting	B									0		AFC meeting	B	81								40500
										51500												198000
														31500	45000	81000	40500

## Sheet: ANM info
District	Name of Block	Name of PHC	Name of Subcenter	No. of ANM	Permanent	Contractual	Salaries 2019-2020 (P)		Salary 2020-21 (C)		Remarks			Nandgaon (5+2)							Sinner (7P, 5C)					Dindori										2019-20
Nashik	Dindori Block	PHC Nanashi	SC Gandole											Vhelgaon 4 (Sc)	Bolthan (3SC)											55000	11000	17000	3400	49395	9879	19000	3800				D1		D2		D3		D4		Total
Nashik			SC Mahaje										Sc1	1P 1C	45000	9000	16000	3200								55000	11000	17000	3400	49395	9879	19000	3800			D	90000	18000	90000	18000	100000	20000	80636	16127.2	72127.2
Nashik			SC Nanashi 1										Sc2	1P	50000	10000	14100	2820								55000	11000			55000	11000					N	40000	8000	90000	18000	80636	16127.2		0	42127.2
Nashik			SC Nanashi 2										Sc3	1C	50000	10000					45000	9000	18000	3600		47000	9400			49395	9879					Si	90000	18000	90000	18000	70000	14000	65000	13000	63000
Nashik			SC Palasvihir										Sc4	1P	47000	9400					45000	9000	18000	3600		47000	9400			55000	11000					Su	72000	14400	90000	18000	80636	16127.2	80636	16127.2	64654.4
			5												47000	9400					45000	9000	10000	2000		47000	9400			55000	11000
Nashik		PHC Umrale	SC Ambegan													47800		6020			49395	9879	10000	2000		47000	9400			55000	11000
Nashik			SC Rasegaon																		49395	9879	18000	3600		47000	9400			49395	9879
Nashik			SC Kokangaon Umrale																		49395	9879				47000	9400			49395	9879					Si	90000	4500	90000	4500	70000	3500	65000	3250	15750
Nashik			SC Jalkhed																		49395	9879				47000	9400			49395	9879					Su	72000	3600	90000	4500	80636	4031.8	80636	1791.91	13923.7
			SC Thepnapada											Surganan (9p,3c)								66516		14800		47000	9400			49395	9879													0
Nashik			SC Jambutake																							47000	9400			49395	9879													0
			SC Umrale Budruk												50000	10000	18000	3600			Dindori (12 P, 2C)						117600		6800		123032		7600
			7												52000	10400	18000	3600																		2020-21
Nashik	Nandgaon Block	PHC Bolthan	SC Bolthan												65000	13000	14100	2820					81316														D1		D2		D3		D4		Total
Nashik			SC Jategaon Bolthan												45000	9000		10020																			D1
Nashik			SC Kasari Bolthan												47000	9400																				D	80000	16000	90000	18000	90000	18000	70333.3	14066.7	66066.7
			3												47000	9400																				N	40000	8000	70333.3	14066.7	70333.3	14066.7	70333.3	14066.7	50200
Nashik		PHC Vehelgaon	SC Kalamdari												47000	9400																				Si	70000	14000	70000	14000	70000	14000	70333.3	14066.7	56066.7
Nashik			SC Sakore Vehelgaon												47000	9400																				Su	78000	15600	45000	9000	70333.3	14066.7	70333.3	14066.7	52733.3
Nashik			SC Talwade Vehelgaon												47000	9400
Nashik			SC Vehelgaon													89400
			4
	Surgana Block	PHC Borgaon	SC Borgoan
			SC Gagbhari
			SC Hatgad
			SC Mohpada
			SC Sarad							a
			5
		PHC Palsan	SCAmda Palsan
			SC Bhavada
			SC Palsan 1
			SC Palsan 2
			SC Alangun (New SC)
			5
	Sinner Block	PHC Naigaon	SC Baragaon Pimpri
			SC Brahmanwade
			SC Chincholi
			SC Kundewadi
			SC Naigaon
			SC Nimgaon Sinnar
			SC Hivargaon (2017-18) New SC
			7
		PHC Pandurli	SC Konambe
			SC Pandhurli
			SC Paste
			SC Shivada
			SC Sonambe
			SC Wadgaon Pingala
			SC Belu (2017-18) New SC
			7

## Sheet: Calculation 2020-21
BLOCKS	Dindori	Nandgaon	Sinnar	Surgana		Total Programme Cost for Nashik in INR (FY 2020-21)												Total Programme Cost for Nashik
Programme Activity						Programme Activity	Dindori	(%)	Nandgaon	(%)	Sinnar	(%)	Surgana	(%)	Average Cost	% Share			Dindori	Nandgaon	Sinnar	Surgana	Babhulgaon	Pusad	Yavatmal	Zari zamini				Human Resource Cost	Monitoring	Meetings	Training	PE Incentives cost	Total Cost	Per Unit cost (PE +AEP)	Per Unit cost (AEP)	Per Unit cost (PE)
																												Dindori		226753	6453.9	31500	0	88000	352707	99.9736	105.854	1799.52
Human Resource Cost	226753	126467	163644	186276		Human Resource Cost	226753	64.2893	126467	54.7384	163644	36.7619	186276	58.8613	175785	52.2642		Human Resource Cost	226753	126467	163644	186276	262144	202170	200629	120920		Nandgaon		126467	6572.02	45000	0	53000	231039	48.2538	51.0923	868.569
Monitoring	6453.9	6572.02	6500.77	6690.15		Monitoring	6453.9	1.82982	6572.02	2.84455	6500.77	1.46037	6690.15	2.11402	6554.21	1.94869		Monitoring	6453.9	6572.02	6500.77	6690.15	8597.11	6217.54	5537.67	4848.04		Sinnar		163644	6500.77	81000	0	194000	445144	134.404	142.31	2419.26
Meetings	31500	45000	81000	40500		Meetings	31500	8.93093	45000	19.4772	81000	18.1963	40500	12.7976	49500	14.7173		Meetings	31500	45000	81000	40500	48500	44000	48500	29000		Surgana		186276	6690.15	40500	0	83000	316466	40.8871	43.2923	735.968
Training	0	0	0	0		Training	0		0		0		0		0	0		Training	0	0	0	0	0	412500	187500	0		Babhulgaon		262144	8597.11	48500	0	91800	411041	115.819	122.882	2014.91
PE Incentive cost	88000	53000	194000	83000		PE Incentives cost	88000	24.9499	53000	22.9398	194000	43.5814	83000	26.2271	104500	31.0698		PE Incentives cost	88000	53000	194000	83000	91800	46800	166000	72900		Pusad		202170	6217.54	44000	412500	46800	711687	242.07	277.786	1882.77
Total Cost	352707	231039	445144	316466		Total Cost	352707		231039		445144		316466		336339			Total Cost	352707	231039	445144	316466	411041	711687	608167	227668		Yavatmal		200629	5537.67	48500	187500	166000	608167	410.646	460.384	3801.04
Per unit cost						Per Unit cost (PE +AEP)	99.9736		48.2538		134.404		40.8871		80.8795			Per Unit cost (PE +AEP)	99.9736	48.2538	134.404	40.8871	115.819	242.07	410.646	162.156		Zari zamini		120920	4848.04	29000	0	72900	227668	162.156	182.426	1459.41
						Per Unit cost (AEP)	105.854		51.0923		142.31		43.2923		85.6371			Per Unit cost (AEP)	105.854	51.0923	142.31	43.2923	122.882	277.786	460.384	182.426
Community	219581	115461	152638	175036		Per Unit cost (PE)	1799.52		868.569		2419.26		735.968		1455.83			Per Unit cost (PE)	1799.52	868.569	2419.26	735.968	2014.91	1882.77	3801.04	1459.41
Hr D	6271.65	6271.65	6271.65	6271.65
B	900	4734.38	4734.38	4968.75			AEP	3332	4522	3128	7310
Total	226753	126467	163644	186276			PE	196	266	184	430		(Av taken 17)
		137473	174650	197517	0		(PE+AEP)	3528	4788	3312	7740
Moni D	5096.4	5096.4	5096.4	5096.4
B	1357.5	1475.62	1404.38	1593.75			PE	2940	3990	2760	6450
Total	6453.9	6572.02	6500.77	6690.15				187974	422953	185069	46618.9
								63.9367	106.003	67.054	7.22773
							HR differences : anms and their apportioned salaries are much higher wheras the prog is AF Mentors: mailny largely their activity is monitoring.

## Sheet: Calculation 2019-20
Total Programme cost for Nashik (2019-2020)						Total Programme cost for Nashik (2019-2020)
BLOCKS	Dindori	Nandgaon	Sinnar	Surgana			BLOCKS
Programme Activity						Programme Activity	Dindori	(%)	Nandgaon	(%)	Sinnar	(%)	Surgana	(%)	Average Cost	% Share
Human Resource Cost	224683	116981	52436.2	79009.2		Human Resource Cost	224683	61.2167	116981	37.0341	52436.2	89.2421	79009.2	92.4649	118277	57.2005
Monitoring	6346.03	6392.28	6321.03	6438.53		Monitoring	6346.03	1.72903	6392.28	2.02369	6321.03	10.7579	6438.53	7.53506	6374.47	3.08278
Meetings	19000	32500	0	0		Meetings	19000	5.1767	32500	10.2889	0		0		12875	6.22652
Training	0	0	0	0		Training	0		0		0		0		0	0
PE Incentive cost	117000	160000	0	0		PE Incentives cost	117000	31.8776	160000	50.6532	0		0		69250	33.4902
Total Cost	367029	315873	58757.2	85447.7		Total Cost	367029		315873		58757.2		85447.7		206777
Per unit cost (PE+AEP)						Per Unit cost (PE +AEP)	104.033		65.9718		17.7407		11.0398		49.6964
						Per Unit cost (AEP)	110.153		69.8525		18.7843		11.6892		52.6197
Community	217722	106545	42000	68698		Per Unit cost (PE)	1872.6		1187.49		319.333		198.716		894.535
Hr D	6061.18	6061.18	6061.18	6061.18
B	900	4375	4375	4250			AEP	3332	4522	3128	7310
Total	224683	116981	52436.2	79009.2			PE	196	266	184	430
							(PE+AEP)	3528	4788	3312	7740
Moni D	4988.53	4988.53	4988.53	4988.53
B	1357.5	1403.75	1332.5	1450			PE	2940	3990	2760	6450
Total	6346.03	6392.28	6321.03	6438.53				187974	422953	185069	46618.9
								63.9367	106.003	67.054	7.22773

## Sheet: Sheet2
Total Programme Cost for Nashik
Programme Activity	Dindori	(%)	Nandgaon	(%)	Sinnar	(%)	Surgana	(%)	Average Cost
Human Resource Cost	232603	65.258	117825	53.5071	170007	37.837	197268	60.6618	179426	1.21344e+06
Monitoring	4332.8	1.21559	4379.05	1.98863	4307.8	0.958747	4425.3	1.36082	4361.23	18742.4
Meetings	31500	8.8375	45000	20.4356	81000	18.0274	40500	12.4541	49500	812.5
Training	0		0		0		0		0	103000
PE Incentives cost	88000	24.6889	53000	24.0686	194000	43.1768	83000	25.5233	104500	283059
Total Cost	356436		220204		449315		325193		337787	1.61905e+06
Per Unit cost (PE +AEP)	101.031		45.9907		135.663		42.0146		81.1747	160.931
Per Unit cost (AEP)	106.973		48.6961		143.643		44.4861		85.9496	168.978
Per Unit cost (PE)	1818.55		827.833		2441.93		756.264		1461.14	3379.56

[truncated: 2 more sheets: Print me, Tables]
