# Supplementary material for: Cost of providing Peer Education programme in the National Adolescent Health programme and its variations across two states of India.
Source: Research Square preprint supplement (doi:10.21203/rs.3.rs-8470187/v1), 2026-01-20
Supplement: Supplementary file 5 [file cfc1bea92c0ce6f1ba5b440a.xlsx]

## Sheet: HR
Human Resource Cost for the year 2019-20 : Yavatmal										Human Resource Cost for the year 2020-21 : Yavatmal
S. No	A. Personnel	B. No. of personnel	Time contribution for PE programme programme in a month	G. Gross salary per month (INR)	Per day's salary	Per hour's salary	Apportioned salary for a month	Total cost for an year		S. No	A. Personnel	B. No. of personnel	Time contribution for PE programme programme in a month	G. Gross salary per month (INR)	Per day's salary	Per hour's salary	Apportioned salary for a month	Total cost for an year
BLOCK 1 : Babhulgaon										BLOCK 1 : Babhulgaon
1	MO	4	1hrs					12880		1	MO	4	4					55160
2	ASHA incentive	NA						20400		2	ASHA incentive							0
3	Asha F.	4	5 hrs	7850	261.667	32.7083	163.542	7850		3	Asha F.	4	9	8475				15255
4	ANM ( P)	16						0		4	ANM ( P)	15	5					141990
5	ANM (C)	10						0		5	ANM (C)	10	5					36600
TOTAL								41130		TOTAL								249005			249005	190850	190220	109659
BLOCK 2 : Pusad										BLOCK 2 : Pusad
1	MO	4	1	60000				50640		1	MO	4	4					53730
2	ASHA incentive	NA						37800		2	ASHA incentive							0
3	Asha F.	3	9	7850	261.667	32.7083	294.375	10597.5		3	Asha F.	3	9	8475				11441.2
4	ANM ( P)	9	5					94200		4	ANM ( P)	9	5					97679
5	ANM (C)	7	5					22400		5	ANM (C)	7	5					28000
TOTAL								215638		TOTAL								190850
BLOCK 3 : Yavatal										BLOCK 3 : Yavatal
1	MO	3	1	85000, 56000*2				39400		1	MO	4	4	72000*2,				56380
2	ASHA incentive	NA						16200		2	ASHA incentive							0
3	Asha F.	2	9	7850	261.667	32.7083	294.375	7065		3	Asha F.	2	9	8475				7627.5
4	ANM ( P)	10	5					91800		4	ANM ( P)	11	5					105812
5	ANM (C)	6	5					15860		5	ANM (C)	6	5					20400
TOTAL								170325		TOTAL								190220
BLOCK 4 : Zari Zamini										BLOCK 4 : Zari Zamini
1	MO	2	1	65000*1				6470		1	MO	2	4	65000*1				27790
2	ASHA incentive	NA						15600		2	ASHA incentive							0
3	Asha F.	5	5	7850			163.54	9812.4		3	Asha F.	5	9	8475				19068.8
4	ANM ( P)	5						0		4	ANM ( P)	4	5					39800
5	ANM (C)	10						0		5	ANM (C)	7	5					23000
TOTAL								31882.4		TOTAL								109659
	2019-20			2020-21
	B	141600		B	141990
		29080			36600
	P	94200		P	97679
		22400			28000
	Y	91800		Y	105812
		15860			20400
	Z	50200		Z	39800
		25720			23000
			B		P		Y		Z
Docs
2019-20	TOTAL		12880		50640		39400		6470
Docs
2020-21	TOTAL		55160		53730		56380		27790

## Sheet: HR +Moni Dist.
Human Resource Cost for the year 2019-20																							Human Resource Cost for the year 2020-21
S. No	A. Personnel	B. No. of personnel	D. Total no of hours contributed in a month for PE programme apart from Monitoring(hrs)	G. Gross salary per month (INR)		Per hour's salary	Apportioned salary for a month	Total cost for a year	Total HR cost per block												Remarks		S. No	A. Personnel	B. No. of personnel	D. Total no of hours contributed in a month for RKSK	G. Gross salary per month (INR)		Per hour's salary	Apportioned salary for a month	Total cost for a year	Total HR cost per block												Remarks
					Per day's salary					Total number of visits for monitoring in a month	Total number of visits for monitoring in a Year	TC in each monitoring visit (in min)	Total cost for monitoring apportioned from salary in a year	Total cost from apprtioned from salary for monitoring per block	Mobility support	Total time contributed for monitoring in all visits in a year	Total time contributed for monitorin PE prog in in a year	Cost apportioned for monitoring from m obility support	Total Cost apportioned for monitoring from mobility support per block	Total monitoring costs per block								Per day's salary					Total number of visits for monitoring in a month	Total number of visits for monitoring in a Year	TC in each monitoring visit (in min)	Total cost for monitoring apportioned from salary in a year	Total cost from apprtioned from salary for monitoring per block	Mobility support	Total time contributed for monitoring in all visits in a year	Total time contributed for monitorin PE prog in in a year	Cost apportioned for monitoring from m obility support	Total Cost apportioned for monitoring from mobility support per block	Total monitoring costs per block
1	DHO		2 hrs	162328	5410.92	676.365	1352.73	16232.8	1014.55	2	24	15min	4058.19	253.637	235200	11520	360	7350	459.375	713.012			1	DHO	1	2	167508	5583.61	697.951	1395.9	16750.8	1046.93	2	24	15	4187.71	261.732	235200	11520	360	7350	459.375	721.107
2	DPM		2 hrs	25000	833.333	104.167	208.333	2500	156.25	4	48	15 min	1250	78.125	235200	23040	720	7350	459.375	537.5			2	DPM	1	2	35000	1166.67	145.833	291.667	3500	218.75	4	48	15	1750	109.375	235200	23040	720	7350	459.375	568.75
4	RkSK Nodal officer		2 hrs	152850	5094.99	636.874	1273.75	15285	955.31	2	24	15 min.	3821.24	238.828	235200	11520	360	7350	459.375	698.203			3	RKSK nodal Officer	1	2	157728	5257.59	657.199	1314.4	15772.8	985.799	2	24	15	3943.2	246.45	235200	11520	360	7350	459.375	705.825
5	RKSK Coordinator		60	18076	602.533	75.3167		54228	2711.4	8	96	90 min	10845.6	677.85		46080			600	1277.85			4	RKSK Coordinator	1	60	24063	802.1	100.263	6015.75	72189	3609.45	8	96	90	14437.8	902.363		46080			600	1502.36
Total									4837.51											3226.56			Total									5860.93											3498.04
											235200	14700	1260		40320		7350	459.375														5860.93											3498.04
															1260									9756.36	152850

## Sheet: Training
Training Cost for 2019-20 : Yavatmal														Training Cost for 2020-21 : Yavatmal
Number of Training (PE TRAINING)	Level of training	Duration of training (in hrs.)	No of trainees trained	Type of Trainer - (Hired/ department personnel)	Expenditure incurred in Training Activities.									Number of Training (PE TRAINING)	Level of training	Duration of training (in hrs.)	No of trainees trained	Type of Trainer - (Hired/ department personnel)	Expenditure incurred in Training Activities.
	(State level/District level/Block level/ any other training)				Trainer (TA/DA, Accomodation etc.)	Trainees (TA/DA, Accomodation etc.)	Development of training materials	Printing of training material	Venue cost	Any other cost (Food expenses etc.)	Total Cost				(State level/District level/Block level/ any other training)				Trainer (TA/DA, Accomodation etc.)	Trainees (TA/DA, Accomodation etc.)	Development of training materials	Printing of training material	Venue cost	Any other cost (Food expenses etc.)	Total Cost (it also includes the Administrative cost borne by the NGO)
Block 1														Block 1
Babhulgaon												141074		Babhulgaon												0
Block 2														Block 2
Pusad												0		Pusad												412500
Block 3														Block 3
Yavatmal												0		Yavatmal												187500
Block 4														Block 4
Zari Zamini												147659		Zari Zamini												o
																							412500	187500

## Sheet: Meeting 
Meeting Cost for 2019-20											Meeting Cost for 2020-21
Name of the meeting	Level (District/Block/Sub centre)	No of meetings in a year	No. of participants in the meeting	Duration of meeting in hrs.	Expenditure (incurred during meetings)				Total cost for the year		Name of the meeting	Level (District/Block/Sub centre)	No of meetings in a year	No. of participants in the meeting	Duration of meeting in hrs.	Expenditure (incurred during meetings)				Apportioned cost	Total cost for the year
					Venue Cost	Accommodation Cost (If any)	Transport	Total Cost								Venue Cost	Accommodation Cost (If any)	Transport	Total Cost
							cost (if any)											cost (if any)
Babhulgaon											Babhulgaon
AFC meeting	SC								0		AFC meeting	SC	97								48500
Pusad											Pusad
AFC meeting	SC	72							36000		AFC meeting	SC	88								44000
Yavatmal											Yavatmal
AFC meeting	SC	60							30000		AFC meeting	SC	97								48500
Zari Zamini											Zari Zamini
AFC meeting	SC								0		AFC meeting	SC	58								29000
									66000
																					170000
														48500	44000	48500	29000

## Sheet: Calculation 2020-21
Total Programme cost for Yavatmal (2020-2021)						Total Programme cost for Yavatmal (2020-2021)
BLOCKS							BLOCKS
Programme Activity	Babhulgaon	Pusad	Yavatmal	Zari zamini		Programme Activity	Babhulgaon	(%)	Pusad	(%)	Yavatmal	(%)	Zari zamini	(%)	Average Cost
Human Resource Cost	262144	202170	200629	120920		Human Resource Cost	262144	63.7756	202170	24.3318	200629	38.9521	120920	59.9896	196466	40.1244
Monitoring	8597.11	6217.54	5537.67	4848.04		Monitoring	8597.11	2.09154	6217.54	0.748302	5537.67	1.07514	4848.04	2.40517	6300.09	1.28668
Meetings	48500	44000	48500	29000		Meetings	48500	11.7993	44000	5.29554	48500	9.41625	29000	14.3872	42500	8.67983
Training	0	412500	187500	0		Training	0	0	412500	49.6457	187500	36.403	0	0	150000	30.6347
PE Incentive cost	91800	166000	72900	46800		PE Incentives cost	91800	22.3335	166000	19.9786	72900	14.1535	46800	23.218	94375	19.2743
Total Cost	411041	830887	515067	201568		Total Cost	411041		830887		515067		201568		489641
						Per Unit cost (PE +AEP)	115.819		282.615		347.783		143.567		222.446
						Per Unit cost (AEP)	122.882		324.312		389.907		161.513		249.653
HR	B	P	Y	Z		Per Unit cost (PE)	2014.91		2198.11		3219.17		1292.1		2181.07
Community Level	249005	190850	190220	109659
B level	7278	5458.5	4548.75	5400
D level	5860.93	5860.93	5860.93	5860.93		Total no. of PE	204		378		160		156
Total HR	262144	202170	200629	120920		Total no AEP	3345		2562		1321		1248
Meetings						Total PE +AEP	3549		2940		1481		1404
Monitoring													In Pusad , the peer educators had made just that only group.
B level	5099.06	2719.5	2039.62	1350
D level	3498.04	3498.04	3498.04	3498.04
Total	8597.11	6217.54	5537.67	4848.04
Training													a
						115.819
						122.882
						2014.91

## Sheet: Incentive
Indicators	FY 2019-20				FY 2020-21
	Yavatmal				Yavatmal
	Babhulgaon	Zari Zamini	Pusad	Yavatmal	Babhulgaon	Zari Zamini	Pusad	Yavatmal
Total number of Adolescent Brigade members active in each block	3345	1248	2562	1321	3345	1248	2562	1321		16.3971	8	6.77778	8.25625
Total number of Peer educators active in each financial year.	204	156	378	160	204	156	378	160		9.85777	10.477		0
Cost of IEC related exclusively for Peer Educator strategy.													31.4311	10.477
Incentive	0	0	34400	24940	91800	46800	166000	72900
20	4080	3120	7560	3200		16.3971
15	3060	2340	5670	2400
			3780

## Sheet: BCM
Human Resource Cost for the year 2019-20 : Yavatmal														Human Resource Cost for the year 2020-21 : Yavatmal
S. No	A. Personnel	B. No. of personnel	Time contribution for PE programme programme in a month apart from moni (hr)	G. Gross salary per month (INR)	Per hour's salary				Apportioned salary for an year			Total moni cost for an year		S. No	A. Personnel	B. No. of personnel	Time contribution for PE programme programme in a month apart from moni (hr)	G. Gross salary per month (INR)	Per hour's salary				Apportioned salary for an year			Total moni cost for an year
						HR COST for an year	TC moni in 1 visit for PE prog (in min)	Total number of visits for PE prog in a year		TA/DA per visit	Cost apportioned from TA/DA									HR COST for an year	TC moni in 1 visit for PE prog (in min)	Total number of visits for PE prog in a year		TA/DA per visit	Cost apportioned from TA/DA
Babhulgaon	BCM	1	8	18195	75.8125	7278	45	60	3411.56	300	1687.5	5099.06		Babhulgaon	BCM	1	8	18195	75.8125	7278	45	60	3411.56	300	1687.5	5099.06
Pusad	BCM	1	6	18195	75.8125	5458.5	40	36	1819.5	300	900	2719.5		Pusad	BCM	1	6	18195	75.8125	5458.5	40	36	1819.5	300	900	2719.5
Yavatmal	BCM	1	5	18195	75.8125	4548.75	45	24	1364.62	300	675	2039.62		Yavatmal	BCM	1	5	18195	75.8125	4548.75	45	24	1364.62	300	675	2039.62
Zari	BCM	1	6	17000	70.8333	5100	30	24	850	300	450	1300		Zari	BCM	1	6	18000	75	5400	30	24	900	300	450	1350
										8 hrs	300
										1 hr	37.5
										45min	28.125								HR	7278	5458.5	4548.75	5400
																			Moni	5099.06	2719.5	2039.62	1350

## Sheet:  Calculation 2019-20
Total Programme cost for Yavatmal (2019-2020)						Total Programme cost for Yavatmal (2019-2020)
BLOCKS							BLOCKS
Programme Activity	Babhulgaon	Pusad	Yavatmal	Zari zamini		Programme Activity	Babhulgaon	(%)	Pusad	(%)	Yavatmal	(%)	Zari zamini	(%)	Average Cost	% share
Human Resource Cost	53245.5	225934	179711	41819.9		Human Resource Cost	53245.5	26.2752	225934	74.7432	179711	74.9055	41819.9	21.556	125178	53.3324
Monitoring	8325.63	5946.06	5266.19	4526.56		Monitoring	8325.63	4.10848	5946.06	1.96707	5266.19	2.195	4526.56	2.33321	6016.11	2.56319
Meetings	0	36000	30000	0		Meetings	0		36000	11.9095	30000	12.5043	0	0	16500	7.02989
Training	141074	0	0	147659		Training	141074	69.6163	0		0	0	147659	76.1107	72183.2	30.754
PE Incentive cost	0	34400	24940	0		PE Incentives cost	0		34400	11.3802	24940	10.3952	0		14835	6.32051
Total Cost						Total Cost	202645		302280		239917		194005		234712
						Per Unit cost (PE +AEP)	57.0992		102.816		161.997		138.181		115.023
						Per Unit cost (AEP)	60.5815		117.986		181.618		155.453		128.91
HR	B	P	Y	Z		Per Unit cost (PE)	993.359		799.681		1499.48		1243.62		1134.04
Community Level	41130	215638	170325	31882.4
B level	7278	5458.5	4548.75	5100
D level	4837.51	4837.51	4837.51	4837.51		Total no. of PE	204		378		160		156
Total HR	53245.5	225934	179711	41819.9		Total no AEP	3345		2562		1321		1248
Meetings						Total PE +AEP	3549		2940		1481		1404
Monitoring													In Pusad , the peer educators had made just that only group.
B level	5099.06	2719.5	2039.62	1300
D level	3226.56	3226.56	3226.56	3226.56
Total	8325.63	5946.06	5266.19	4526.56
Training

## Sheet: ANM
District	Name of Block	Name of PHC	Name of Subcenter	No. of ANM	Permanent	Contractual	Salaries 2019-2020 (P)		Salary 2020-21 (C)		Remarks
Yeotmal	Pusad Block	PHC Belura	SC Belura Kh	1	Permanent		60000	62000			The data recorded as per the BCM. In Dhansal both years the post was vacant and from 20-21 the anm from Rajna is working in both of these PHC
Yeotmal			SC Lakhi	1		Contractual			11000	20000
Yeotmal			SC Marwadi Bk	1		Contractual			11000	20000
Yeotmal			SC Marwadi Khu	1	Permanent		60000	62000
Yeotmal			SC Pandhurna B	2	Permanent	Contractual	60000	62000	18000	20000
Yeotmal			SC Rohada	1		Contractual			18000	20000
Yeotmal		PHC Jamb Bazar(24X7)	SC Bhojla	1	Permanent		50000											2019-20
Yeotmal			SC Brhamangaon	2	Permanent	Contractual	40000	42000	18000	20000								Perma Pusad			contrac						P	C
Yeotmal			SC Dhansal									Pusad	P (9)	C (7)	TC	Apportioned (P)	App ©	60000	4	12000	11000	4	2200		62000	4	12400	20000	4000
Yeotmal			SC Pardi Lamb Bazar	1	Permanent		50000	52000				sum	471000	112000	4 hrs			60000	4	12000	11000	4	2200			4	0	20000	4000
Yeotmal			SC Parwa Jamb	1	Permanent		50000	52000										60000	4	12000		4	0			4	0		0
Yeotmal			SC Rajna	1	Permanent		45000	47000										50000	4	10000	18000	4	3600		62000	4	12400	20000	4000
Yeotmal			SC Waltur (R)	2	Permanent	Contractual	56000	60000	18000	20000								50000	4	10000	18000	4	3600		62000	4	12400	20000	4000
Yeotmal			SC Wanwarla	1		Contractual			18000	20000								45000	4	9000		4	0			4	0		0
	yavatmal	PHC Akola Bazar(24X7)	SC Borisinh	2 ANM	1	1	40000	40000	11000	13000								56000	4	11200	18000	4	3600		52000	4	10400	20000	4000
			SC Ghodkhind	2 ANM	1	1	40000	40000	13000	15000								50000	4	10000	18000	4	3600		42000	4	8400		0
Yeotmal		PHC Hiwari	SC Borjai		1													40000	4	8000	18000	4	3600			4	0		0
Yeotmal			SC Bothbodan		1																				52000	4	10400		0
Yeotmal			SC Hiwari		1															94200			22400		52000	4	10400		0
Yeotmal			SC Mahsola		1	1																116600			47000	4	9400	20000	4000
Yeotmal			SC Manpur		1																				60000	4	12000	20000	4000
Yeotmal			SC Tiwsa		1	1
Yeotmal			SC Umarsara 1	1		1			13000	20000																	86200		28000
Yeotmal			SC Umarsara 2	1 AMN in each year			above 50000		18000
Yeotmal			SC Arjuna	1	1
Yeotmal	Babhulgaon	PHC Madani(24X7)	Madani
Yeotmal			Naigaon
Yeotmal			Veni
Yeotmal			Sukali
Yeotmal			karalgaon
Yeotmal			umari
Yeotmal			Galva
Yeotmal		PHC Pahur(24X7)	Dehani		1		45000	47000
Yeotmal			Dabha		1	1	45000					tc	1	4	4	1
Yeotmal			Aasegaon		1		45000	47000					B	P	Y	Z
Yeotmal			savar		1	1	40000	42000				2019-20
Yeotmal			Rani Amravti		1	1	33000	35000	18500	21000		P	16	9	10	5
Yeotmal			Falegaon		1	1	43000	45000				C	10	7	6	10
Yeotmal			Kotha		1		38000
Yeotmal			Dighi		1	1	43000
Yeotmal		Zari Zamini	Bopapur	2	1	1		40000
Yeotmal			Dhanora	2	1	1
Yeotmal			Adegaon	2	1	1	45000	47000	11000	13000
Yeotmal			Durbha	1		1				12000			B	P	Y	Z
Yeotmal			Mangli	1		1				12000		2020-21
Yeotmal			Pandharkada	1		1						P			11
Yeotmal			Khadki	(Durbha's ANM is on charge here)								C			6
Yeotmal			Ligti	1		1
Yeotmal			mukutband	1 in each year	1			45000			1 ANM in 2019-20, 1 ANM in 2020-21
Yeotmal		PHC Shibala	Shibla	1		1			11000	20000
Yeotmal			Hiwarabarsa	1	1		65000	67000	11000	20000
Yeotmal			Chikhaldhoh	1		1			11000	20000
Yeotmal			Susri	1		1
	MO	Salary MO1	MO2	MO3	MO4	Total Salary	Total time contribution by by all in a month (2019-20)	Total cost apportioned for PE prog in a year	TC (2020-21)	0.03
Bab.	4	64400	64400	64400	64400	257600	4	51520		7728	Babu	64400	1	3220
Pusad	4	60000	64400	64400	64400	253200	16	202560		7596		64400	1	3220
Yavatmal	3	85000	56000	56000		197000	12	118200		5910		64400	1	3220
Zari	2	65000	64400			129400	2	12940		3882		56000	1	2800
														12460
	Av	64400
	MO	Salary MO1	MO2	MO3	MO4	Total Salary	Total time contribution by by all in a month (2020-21)	Total cost apportioned for PE prog in a year
Bab.	4	68950	68950	68950	68950	275800	16	220640		1800
Pusad	4	61800	68950	68950	68950	268650	16	214920
Yavatmal	4	72000	72000	68950	68950	281900	16	225520
Zari	2	70000	68950			138950	16	111160
	Av.	68950

## Sheet: ANM2
	yavatmal	PHC Akola Bazar(24X7)	SC Borisinh	2 ANM	1	1	40000	40000	11000	13000
			SC Ghodkhind	2 ANM	1	1	40000	40000	13000	15000
Yeotmal		PHC Hiwari	SC Borjai		1
Yeotmal			SC Bothbodan		1
Yeotmal			SC Hiwari		1
Yeotmal			SC Mahsola		1	1
Yeotmal			SC Manpur		1
Yeotmal			SC Tiwsa		1	1
Yeotmal			SC Umarsara 1	1		1			13000	20000
Yeotmal			SC Umarsara 2	1 AMN in each year			above 50000		18000
Yeotmal			SC Arjuna	1	1
Yeotmal	Babhulgaon	PHC Madani(24X7)	Madani
Yeotmal			Naigaon
Yeotmal			Veni
Yeotmal			Sukali
Yeotmal			karalgaon
Yeotmal			umari
Yeotmal			Galva
Yeotmal		PHC Pahur(24X7)	Dehani		1		45000	47000										2019-20			2020-21
Yeotmal			Dabha		1	1	45000					tc	1	4	4	1		Prmanent			Cont
Yeotmal			Aasegaon		1		45000	47000					B	P	Y	Z		40000	41200		11000	13000
Yeotmal			savar		1	1	40000	42000				2019-20						40000	41200		13000	15000
Yeotmal			Rani Amravti		1	1	33000	35000	18500	21000		P	16	9	10	5		50000	51500		13000	18000
Yeotmal			Falegaon		1	1	43000	45000				C	10	7	6	10		45000	47000		18500	20000
Yeotmal			Kotha		1		38000											45000	47000		11000	21000
Yeotmal			Dighi		1	1	43000											45000	42000		11000	13000
Yeotmal		Zari Zamini	Bopapur	2	1	1		40000										40000	35000		11000	12000
Yeotmal			Dhanora	2	1	1												33000	45000		11000	12000
Yeotmal			Adegaon	2	1	1	45000	47000	11000	13000								43000	40000		11000	20000
Yeotmal			Durbha	1		1				12000			B	P	Y	Z		38000	45000		11000	20000
Yeotmal			Mangli	1		1				12000		2020-21						43000	47000			20000
Yeotmal			Pandharkada	1		1						P			11			45000	67000		18000	20000
Yeotmal			Khadki	(Durbha's ANM is on charge here)								C			6			65000	62000		18000	20000
Yeotmal			Ligti	1		1												60000	62000		18000	20000
Yeotmal			mukutband	1 in each year	1			45000			1 ANM in 2019-20, 1 ANM in 2020-21							60000	62000		18000	20000
Yeotmal		PHC Shibala	Shibla	1		1			11000	20000								60000	42000		18000	20000
Yeotmal			Hiwarabarsa	1	1		65000	67000	11000	20000								50000	52000			20000
Yeotmal			Chikhaldhoh	1		1			11000	20000								40000	52000			20000
Yeotmal			Susri	1		1												50000	47000
																		50000	60000
																		45000
																		47000	49395		14100	18000

[truncated: 4 more sheets: ANM FINAL, AF, Sheet3, Docs Sal]
